# **Fixed human-specific neuro-regulatory single nucleotide mutations manifest staggering breadth of associations with physiological processes, morphological features, and pathological conditions of Modern Humans**

Gennadi V. Glinsky<sup>1</sup>

<sup>1</sup> Institute of Engineering in Medicine

University of California, San Diego

9500 Gilman Dr. MC 0435

La Jolla, CA 92093-0435, USA

Correspondence: [gglinskii@ucsd.edu](mailto:gglinskii@ucsd.edu)

Web: <http://iem.ucsd.edu/people/profiles/guennadi-v-glinskii.html>

**Running title:** Global impact of fixed human-specific neuro-regulatory mutations in Modern Humans

**Key words:** human phenotypic uniqueness; human-specific regulatory sequences; human-specific traits; fixed neuro-regulatory human-specific single nucleotide mutations.

## Abstract

Despite recent remarkable advances in identification and characterization of human-specific regulatory DNA sequences, their global impact on physiological and pathological phenotypes of *Homo sapiens* remains poorly understood. Gene set enrichment analyses of 8,405 genes linked with 35,074 human-specific (hs) neuro-regulatory single-nucleotide changes (SNCs) revealed the staggering breadth of significant associations with morphological structures, physiological processes, and pathological conditions of Modern Humans. Significantly enriched traits include more than 1,000 anatomically-distinct regions of the adult human brain, many different types of human cells and tissues, more than 200 common human disorders and more than 1,000 records of rare diseases. Thousands of genes connected with neuro-regulatory hsSNCs have been identified in this contribution, which represent essential genetic elements of the autosomal inheritance and offspring survival phenotypes. A total of 1,494 hsSNCs-linked genes have associated with either autosomal dominant or recessive inheritance and 2,273 hsSNCs-linked genes have been associated with premature death, embryonic lethality, as well as pre-, peri-, neo-, and post-natal lethality phenotypes of both complete and incomplete penetrance. Therefore, thousands of heritable traits and critical genes impacting the offspring survival appear under the human-specific regulatory control in genomes of Modern Humans. Interrogations of the Mouse Genome Informatics (MGI) database revealed readily available mouse models tailored for precise experimental definitions of regulatory effects of neuro-regulatory hsSNCs on genes causally affecting thousands of defined mammalian phenotypes and hundreds of common and rare human disorders. These observations highlight the remarkable translational opportunities afforded by the discovery of genetic regulatory loci harboring hsSNCs that are fixed in humans, distinct from other primates, and located in differentially-accessible (DA) chromatin regions during human brain development.

## Introduction

DNA sequences of coding genes defining the structure of macromolecules comprising the essential building blocks of life at the cellular and organismal levels remain highly conserved during the evolution of humans and other Great Apes (Chimpanzee Sequencing and Analysis Consortium, 2005; Kronenberg et al., 2018). In striking contrast, a compendium of nearly hundred thousand candidate human-specific regulatory sequences (HSRS) has been assembled in recent years (Glinsky et al., 2015-2019; Kanton et al., 2019), thus validating the idea that unique to human phenotypes may result from human-specific changes to genomic regulatory sequences defined as “regulatory mutations” (King and Wilson, 1975). The best evidence of the exquisite degree of accuracy of the contemporary molecular definition of human-specific regulatory sequences is exemplified by the identification of 35,074 single nucleotide changes (SNCs) that are fixed in humans, distinct from other primates, and located within differentially-accessible (DA) chromatin regions during the human brain development in cerebral organoids (Kanton et al., 2019). Therefore, this type of mutations could be defined as fixed neuro-regulatory human-specific single nucleotide changes (hsSNCs). However, only a small fraction of identified DA chromatin peaks (600 of 17,935 DA peaks; 3.3%) manifest associations with differential expression in human versus chimpanzee cerebral organoids model of brain development, consistent with the hypothesis that regulatory effects on gene expression of these DA chromatin regions are not restricted to the early stages of brain development. Annotation of SNCs derived and fixed in modern humans that overlap DA chromatin regions during brain development revealed that essentially all candidate regulatory human-specific SNCs are shared with the archaic humans (35,010 SNCs; 99.8%) and only 64 SNCs are unique to modern humans (Kanton et al., 2019). This remarkable conservation on the human lineage of human-specific SNCs associated with human brain development sows the seed of interest for in-depth exploration of coding genes expression of which may be affected by genetic regulatory loci harboring human-specific SNCs. The GREAT algorithm (McLean et al., 2010, 2011) was utilized to identify 8,405 hsSNCs-linked genes expression of which might be affected by 35,074 human-specific SNCs located in DA chromatin regions during brain development. Comprehensive gene set enrichment analyses of these genes revealed the staggering breadth of associations with physiological processes and pathological conditions of *H. sapiens*, including more than 1,000

anatomically-distinct regions of the adult human brain, many human tissues and cell types, more than 200 common human disorders and more than 1,000 rare diseases. It has been concluded that hsSNCs-linked genes appear contributing to development and functions of the adult human brain and other components of the central nervous system; they were defined as genetic markers of many tissues across human body and were implicated in the extensive range of human physiological and pathological conditions, thus supporting the hypothesis that phenotype-altering effects of neuro-regulatory hsSNCs are not restricted to the early-stages of human brain development. It seems highly likely that hsSNCs and associated genes affect wide spectra of traits defining both physiology and pathology of Modern Humans by asserting human-specific regulatory impacts on thousands essential mammalian phenotypes.

## **Results**

### **Identification and characterization of putative genetic regulatory targets associated with human-specific single nucleotide changes (SNCs) in in differentially accessible (DA) chromatin regions during brain development**

To identify and characterize human genes associated with 35,074 human-specific single nucleotide changes (SNCs) in differentially accessible (DA) chromatin regions during human and chimpanzee neurogenesis in cerebral organoids (Kanton et al., 2019), the GREAT algorithm (McLean et al., 2011) have been employed. These analyses identified 8,405 genes with putative regulatory connections to human-specific SNCs (Figure 1) and revealed a remarkable breadth of highly significant associations with a multitude of biological processes, molecular functions, genetic and metabolic pathways, cellular compartments, and gene expression perturbations (Supplemental Table Set S1). To ascertain patterns of genomic associations between neuro-regulatory human-specific SNCs and putative target genes, the GREAT analyses were performed at different proximity placement distances defined by the single nearest gene maximum extension ranging from 10 Kb to 1 Mb (Figure 1). It has been observed that from 92% of all hsSNCs-linked genes are located within 200 Kb distances from their putative regulatory loci (Figure 1A). Since the size of more than 90% of topologically-associating domains (TADs) in human genomes is 200 kb or more (Dixon et al., 2012), these findings indicate

that a marked majority of neuro-regulatory hsSNCs and their putative target genes would be placed in human genomes within the boundaries of the same TAD.

It has been noted that particularly striking numbers of significant associations were uncovered by the GREAT algorithm during the analyses of two databases:

- 1) The Human Phenotype Ontology containing over 13,000 terms describing clinical phenotypic abnormalities that have been observed in human diseases, including hereditary disorders (326 significant records with binominal FDR Q-Value < 0.05);
- 2) The MGI Expression Detected ontology referencing genes expressed in specific anatomical structures at specific developmental stages (Theiler stages) in the mouse (370 significant records with binominal FDR Q-Value < 0.05).

These observations support the hypothesis that biological functions of genes under the putative regulatory control of human-specific SNCs in DA chromatin regions during brain development are not limited to the contribution to the early stages of neuro- and corticogenesis. Collectively, findings reported in the Supplemental Table Set S1 argue that genes expression of which is affected by human-specific SNCs may represent a genomic dominion of putative regulatory dependency from HSRS that is likely to play an important role in a broad spectrum of physiological processes and pathological conditions of Modern Humans.

**Identification of hsSNCs-linked genes expression of which distinguishes thousands of anatomically distinct areas of the adult human brain, various regions of the central nervous system, and many different cell types and tissues in the human body**

To validate and extend these observations, next the comprehensive gene set enrichment analyses were performed employing the web-based Enrichr API protocols (Chen et al., 2013; Kuleshov et al., 2016), which interrogated nearly 200,000 gene sets from more than 100 gene set libraries. The results of these analyses are summarized in the Table 1 and reported in details in the Supplemental Table Set S2. Genes expression of which were placed during evolution under the regulatory control of ~ 35,000 human-specific SNCs

demonstrate a staggering breadth of significant associations with a broad spectrum of anatomically distinct regions, various cell and tissue types, a multitude of physiological processes, and a numerous pathological conditions of *H. sapiens*.

Of particular interest is the apparent significant enrichment of human-specific SNCs-associated genes among both up-regulated and down-regulated genes, expression of which discriminates thousands of anatomically distinct areas of the adult human brain defined in the Allen Brain Atlas (Supplemental Figure S1; Supplemental Table Set S2). Notably, genes expressed in various thalamus regions appear frequently among the top-scored anatomical areas of the human brain (Supplemental Figure S1; Supplemental Table Set S2). These observations support the hypothesis that genetic loci harboring human-specific SNCs may exert regulatory effects on structural and functional features of the adult human brain, thus, likely affecting the development and functions of the central nervous system in Modern Humans. Consistent with this idea, the examination of the enrichment patterns of human-specific SNCs-associated genes in the ARCHS4 Human Tissues' gene expression database revealed that top 10 most significantly enriched records overlapping a majority of region-specific marker genes constitute various anatomically-distinct regions of the central nervous system (Supplemental Figure 1; Supplemental Table Set S2). However, results of gene set enrichment analyses convincingly demonstrate that inferred regulatory effects of genetic loci harboring human-specific SNCs are not restricted only to the various regions of the central nervous system, they appear to affect gene expression profiles of many different cell types and tissues in the human body (Table 1; Supplemental Table Set S2).

### **Identification and characterization of hsSNCs-linked genes expression of which is altered during aging of humans, rats, and mice**

Genes altered expression of which is implicated in the aging of various tissues and organs of humans, rats, and mice are significantly enriched among 8,405 genes associated with human-specific regulatory SNCs (Supplemental Figure S2; Supplemental Table Set S2). Aging of the hippocampus was implicated most frequently among genes manifesting increased expression with age, while among genes exhibiting aging-associated decreased expression the hippocampus and frontal cortex were identified repeatedly (Supplemental Figure S2). Overall, twice as many significant association records were observed among aging-

associated down-regulated genes compared to up-regulated genes (Table 1). Collectively, these observations indicate that genes changes in expression of which were associated with aging in mammals, in particular, hippocampal and frontal cortex aging, represent important elements of a genomic dominion that was placed under regulatory control of genetic loci harboring human-specific SNCs.

### **Identification of hsSNCs-linked genes implicated in development and manifestations of hundreds physiological and pathological phenotypes and autosomal inheritance in Modern Humans**

Interrogations of the Human Phenotype Ontology database (298 significantly enriched records identified), the Genome-Wide Association Study (GWAS) Catalogue (241 significantly enriched records identified), and the database of Human Genotypes and Phenotypes (136 significantly enriched records identified) revealed several hundred physiological and pathological phenotypes and thousands of genes manifesting significant enrichment patterns defined at the adjusted p value < 0.05 (Supplemental Figure S3; Table 1; Supplemental Table Set S2). Interestingly, 645 and 849 genes implicated in the autosomal dominant (HP:0000006) and recessive (HP:0000007) inheritance were identified amongst genes associated with human-specific regulatory SNCs (Supplemental Figure S3; Supplemental Table Set S2). Notable pathological conditions among top-scored records identified in the database of Human Genotypes and Phenotypes are stroke, myocardial infarction, coronary artery disease, and heart failure (Supplemental Figure S3).

A total of 241 significantly enriched records (Table 1) were documented by gene set enrichment analyses of the GWAS catalogue (2019), among which a highly diverse spectrum of pathological conditions linked to genes associated with human-specific regulatory SNCs was identified, including obesity, type 2 diabetes, amyotrophic lateral sclerosis, autism spectrum disorders, attention deficit hyperactivity disorder, bipolar disorder, major depressive disorder, schizophrenia, Alzheimer's disease, malignant melanoma, diverticular disease, asthma, coronary artery disease, glaucoma, as well as breast, prostate and colorectal cancers (Supplemental Figure S3; Supplemental Table Set S2). These observations indicate that thousands of genes putatively associated with genetic regulatory loci harboring human-specific SNCs affect risk of developing numerous pathological conditions in Modern Humans.

## **Identification of hsSNCs-linked genes expression of which is altered in several hundred common human disorders**

Gene set enrichment analyses-guided interrogation of the Gene Expression Omnibus (GEO) database revealed the remarkably diverse spectrum of human diseases with the etiologic origins in multiple organs and tissues and highly heterogeneous pathophysiological trajectories of their pathogenesis (Supplemental Figure S4; Supplemental Table Set S2). Overlapping gene sets between disease-associated genes and human-specific SNCs-linked genes comprise of hundreds of genes that were either up-regulated (204 significant disease records) or down-regulated (240 significant disease records) in specific pathological conditions, including schizophrenia, bipolar disorder, various types of malignant tumors, Crohn's disease, ulcerative colitis, Down syndrome, Alzheimer's disease, spinal muscular atrophy, multiple sclerosis, autism spectrum disorders, type 2 diabetes mellitus, morbid obesity, cardiomyopathy (Supplemental Figure S4; Supplemental Table Set S2). These observations demonstrate that thousands of genes expression of which is altered in a myriad of human diseases appear associated with genetic regulatory loci harboring human-specific SNCs.

## **Identification of hsSNCs-linked genes implicated in more than 1,000 records classified as human rare diseases**

Present analyses demonstrate that thousands of genes associated with human-specific regulatory SNCs have been previously identified as genetic elements affecting the likelihood of development a multitude of common human disorders. Similarly, thousands of genes expression of which is altered during development and manifestation of multiple common human disorders appear linked to genetic regulatory loci harboring human-specific SNCs. Remarkably, interrogations of the Enrichr's libraries of genes associated with Modern Humans' rare diseases identified 473, 603, 641, and 1,116 significantly enriched records of various rare disorders employing the Rare Diseases GeneRIF gene lists library, the Rare Diseases GeneRIF ARCHS4 predictions library, the Rare Diseases AutoRIF ARCHS4 predictions library, and the Rare Diseases AutoRIF Gene lists library, respectively (Supplemental Figure S5; Supplemental Table Set S2). Taken together, these observations demonstrate that thousands of genes associated with hundreds of human rare disorders appear linked with human-specific regulatory SNCs.



## **Gene ontology analyses of putative regulatory targets of genetic loci harboring human-specific SNCs**

Gene Ontology (GO) analyses identified a constellation of biological processes (GO Biological Process: 308 significant records) supplemented with a multitude of molecular functions (GO Molecular Function: 81 significant records) that appear under the regulatory control of human-specific SNCs (Supplemental Figure S6; Supplemental Table Set 2). Consistently, both databases identified frequently the components of transcriptional regulation and protein kinase activities among most significant records. Other significantly enriched records of interest are regulation of apoptosis, cell proliferation, migration, and various binding properties (cadherin binding; sequence-specific DNA binding; protein-kinase binding; amyloid-beta binding; actin binding; tubulin binding; microtubule binding; PDZ domain binding) which are often supplemented by references to the corresponding activity among the enriched records, for example, enriched records of both binding and activity of protein kinases.

Interrogation of GO Cellular Component database identified 29 significantly enriched records, among which nuclear chromatin as well as various cytoskeleton and membrane components appear noteworthy (Supplemental Figure S6). Both GO Biological Process and GO Cellular Component database identified significantly enriched records associated with the central nervous system development and functions such as axonogenesis and axon guidance; generation of neurons, neuron differentiation, and neuron projection morphogenesis; cellular components of dendrites and dendrite's membrane; ionotropic glutamate receptor complex. In several instances biologically highly consistent enrichment records have been identified in different GO databases: cadherin binding (GO Molecular Function) and catenin complex (GO Cellular Component); actin binding (GO Molecular Function) and actin cytoskeleton, cortical actin cytoskeleton, actin-based cell projections (GO Cellular Component); microtubule motor activity, tubulin binding, microtubule binding (GO Molecular Function) and microtubule organizing center, microtubule cytoskeleton (GO Cellular Component).

Analyses of human and mouse databases of the Kyoto Encyclopedia of Genes and Genomes (KEGG; Supplemental Figure S7) identified more than 100 significantly enriched records in each database (KEGG 2019 Human (2019): 129 significant records; KEGG 2019 Mouse: 106 significant records). Genes associated with human-specific regulatory SNCs were implicated in a remarkably broad spectrum of signaling pathways

ranging from pathways regulating the pluripotency of stem cells to cell type-specific morphogenesis and differentiation pathways, for example, melanogenesis and adrenergic signaling in cardiomyocytes (Supplemental Figure S7). Genes under putative regulatory control of human-specific SNCs include hundreds of genes contributing to specific functions of specialized differentiated cells (gastric acid secretion; insulin secretion; aldosterone synthesis and secretion), multiple receptor/ligand-specific signaling pathways, as well as genetic constituents of pathways commonly deregulated in cancer and linked to the organ-specific malignancies, for example, breast, colorectal, and small cell lung cancers (Supplemental Figure S7). Other notable entries among most significantly enriched records include pathways of the axon guidance; dopaminergic, glutamatergic, and cholinergic synapses; neuroactive receptor-ligand interactions; and AGE-RAGE signaling pathway in diabetic complications (Supplemental Figure S7; Supplemental Table Set 2).

**Structurally, functionally, and evolutionary distinct classes of human-specific regulatory sequences (HSRS) share the relatively restricted elite set of common genetic targets**

It has been suggested that unified activities of thousands candidate HSRS comprising a coherent compendium of genomic regulatory elements markedly distinct in their structure, function, and evolutionary origin may have contributed to development and manifestation of human-specific phenotypic traits (Glinsky, 2019). It was interest to determine whether genes previously linked to other classes of HSRS, which were identified without considerations of human-specific SNCs, overlap with genes associated in this contribution with genomic regulatory loci harboring human-specific SNCs. It was observed that the common gene set comprises of 7,406 coding genes (88% of all human-specific SNCs-associated genes), indicating that structurally-diverse HSRS, the evolutionary origin of which has been driven by mechanistically-distinct processes, appear to favor the regulatory alignment with the relatively restricted elite set of genetic targets (Supplemental Figure S8; Supplemental Table Set S3).

Previous studies have identified stem cell-associated retroviral sequences (SCARS) encoded by human endogenous retroviruses LTR7/HERVH and LTR5\_Hs/HERVK as one of the significant sources of the evolutionary origin of HSRS (Glinsky, 2015-2019), including human-specific transcription factor binding sites (TFBS) for NANOG, OCT4, and CTCF (Glinsky, 2015). Next, the common sets of genetic regulatory targets

were identified for genes expression of which is regulated by SCARS and genes associated in this study with human-specific regulatory SNCs (Supplemental Figure S8). It has been determined that each of the structurally-distinct families of SCARS appears to share a common set of genetic regulatory targets with human-specific SNCs (Supplemental Figure S8). Overall, expression of nearly half (4,029 genes; 48%) of all genes identified as putative regulatory targets of human-specific SNCs is regulated by SCARS (Supplemental Figure S8; Supplemental Table Set S3). Consistent with the idea that structurally-diverse HSRS may favor the relatively restricted elite set of genetic targets, the common gene set of regulatory targets for HSRS, SCARS, and SNCs comprises of 7,833 coding genes or 93% of all genes associated in this contribution with human-specific regulatory SNCs (Supplemental Figure S8; Supplemental Table Set S3).

To gain insights into mechanisms of SCARS-mediated effects on expression of 4,029 genes linked to human-specific regulatory SNCs, the numbers of genes expression of which was either activated (down-regulated following SCARS silencing) or inhibited (up-regulated following SCARS silencing) by SCARS have been determined. It was observed that SCARS exert the predominantly inhibitory effect on expression of genes associated with human-specific regulatory SNCs, which is exemplified by activated expression of as many as 87% of genes affected by SCARS silencing (Supplemental Figure S8; Supplemental Table Set S3). These findings indicate that when SCARS-associated networks are active during the human preimplantation embryogenesis, they exert a dominant effect on gene expression, whereas when SCARS are silenced during the postimplantation embryonic development and in the adulthood, regulatory impact of human-specific regulatory SNCs is prevalent.

### **Identification of 2,273 genes associated with human-specific SNCs and implicated in premature death and embryonic, prenatal, perinatal, neonatal, and postnatal lethality phenotypes**

Interrogation of MGI Mammalian Phenotype databases revealed several hundred mammalian phenotypes affected by thousands of genes associated with genomic regulatory regions harboring human-specific SNCs: the MGI Mammalian Phenotype (2017) database identified 749 significant enrichment records, while the MGI Mammalian Phenotype Level 4 (2019) database identified 407 significant enrichment records (Supplemental Figure S9; Supplemental Table Set S2). Strikingly, present analyses identified a total of 2,273 genes that

appear under the regulatory control of genetic loci harboring human-specific SNCs and mutations of which result in phenotypes of premature death, embryonic lethality, as well as prenatal, perinatal, neonatal, and postnatal lethality of both complete and incomplete penetrance. A significant fraction of these 2,273 genes, which collectively could be defined based on their mutation phenotypes' patterns as an offspring survival genomic dominion, were implicated in the autosomal dominant (389 genes) and recessive (426 genes) inheritance in Modern Humans. Based on these observations, it has been concluded that thousands of genes within the genomic dominions of putative regulatory dependencies from human-specific SNCs represent the essential genetic elements of the mammalian offspring survival phenotypes.

### **Genes linked with neuro-regulatory hsSNCs represents intrinsic genetic elements of developmentally and physiologically distinct human-specific genomic regulatory networks (GRNs)**

It was of interest to determine whether hsSNCs-linked genes are represented among genes previously identified of human-specific GRNs operating in developmentally and physiologically distinct human tissues and cells. Importantly, human-specific GRNs utilized in these analyses were defined employing vastly different experimental, analytical, and computational approaches that were applied within the broad range of experimental settings (Glinsky, 2019). Specifically, the interrogated human-specific GRNs include the following data sets: i) Great Apes' whole-genome sequencing-guided identification of human-specific insertions and deletions (Kronenberg et al., 2018); ii) genome-wide analysis of retrotransposon's transcriptome in postmortem samples of human dorsolateral prefrontal cortex (Guffanti et al., 2018); iii) shRNA-mediated silencing of LTR7/HERVH retrovirus-derived long non-coding RNAs in hESC (Wang et al., 2014); iv) single-cell expression profiling analyses of human preimplantation embryos (Glinsky et al., 2018); v) network of genes associated with regulatory transposable elements (TE) operating in naïve and primed hESC (Theunissen et al., 2016; Pontis et al., 2019); vi) pluripotency-related network of genes manifesting concordant expression changes in human fetal brain and adult neocortex (Glinsky, 2017); vii) network of genes governing human neurogenesis in vivo (Nowakowski et al., 2017); viii) network of genes differentially expressed during human corticogenesis in vitro (van de Leemput et al., 2014). Thus, selected for these analyses human-specific GRNs appear to function in a developmentally and physiologically diverse spectrum of human cells that are biologically and anatomically

highly relevant to manifestations of human-specific phenotypes ranging from preimplantation embryos to adult dorsolateral prefrontal cortex (Supplemental Table Set S3).

Significantly, in all instances a highly significant enrichment of hsSNCs-linked genes has been observed (Supplemental Table Set S3). These observations are consistent with the hypothesis that neuro-regulatory hsSNCs and associated genes represent important components of the exceptionally broad range of human-specific GRNs operating in the wide spectra of developmental and physiological contexts reflecting species-defining human-specific phenotypes.

### **Identification of the experimentally trackable models for molecular definitions of regulatory effects of human-specific SNCs on expression of genes associated with thousands of mammalian phenotypes and human diseases**

To identify all genes linked with human-specific regulatory SNCs that are associated with defined mammalian phenotypes and human diseases with one or more mouse models, the analyses have been carried out utilizing the Mouse Genome Informatics (MGI) database (<http://www.informatics.jax.org/>). These analyses identified 125,938 Mammalian Phenotype Ontology records and 1,807 Human Disease Ontology records associated with 5,730 and 1,162 human-specific regulatory SNCs-linked genes, respectively (Supplemental Table Sets S4 and S5). Remarkably, genes linked with human-specific regulatory SNCs have been associated with a majority (61%) of all human diseases with one or more mouse models (967 of 1,584 human disease ontology terms; Supplemental Table Set S4). Similarly, human-specific SNCs-linked genes have been associated with 71% of all Mammalian Phenotype Ontology terms (9,190 of 12,936 records; Supplemental Table Set S5). These observations identify readily available mouse models for experimental interrogations of regulatory effects of human-specific SNCs and other types of HSRS on genes causally affecting thousands of defined mammalian phenotypes and hundreds of common and rare human disorders.

### **Discussion**

In recent years, elucidation of genetic and molecular mechanisms defining the phenotypic uniqueness of Modern Humans attained a significant progress in illuminating the potentially broad role of thousands human-

specific regulatory sequences (HSRS) in contrast to the relatively modest impact of human-specific changes of a limited number of coding genes (Kronenberg et al., 2018; Glinsky, 2019; Kanton et al., 2019). The macromolecules comprising the essential building blocks of life at the cellular and organismal levels remain highly conserved during the evolution of humans and other Great Apes. Identification and initial structural-functional characterization of nearly hundred thousand candidate HSRS (Kronenberg et al., 2018; Glinsky, 2019; Kanton et al., 2019; this contribution) validate the idea that unique to human phenotypes may result from human-specific changes to genomic regulatory sequences defined as “regulatory mutations” (King and Wilson, 1975). Technological advances enabled the exquisite degree of accuracy of molecular definition of 35,074 SNCs that are fixed in humans, distinct from other primates, and located in DA chromatin regions during human brain development (Kanton et al., 2019). Notably, 99.8% of candidate regulatory hsSNCs that overlap DA chromatin regions during brain development are shared with the archaic humans while only 64 hsSNCs are unique to Modern Humans. The conservation on the human lineage of a vast majority of regulatory hsSNCs associated with early stages of human brain development suggest that coding genes expression of which is regulated by hsSNCs may have a broad effect on human-specific traits beyond embryonic development. This concept has been substantiated by the multiple lines of evidence acquired and reported in the present contribution.

Employing the GREAT algorithm (McLean et al., 2010, 2011), 8,405 genes have been identified that are linked to hsSNCs via genomic proximity co-localization analysis, indicating that expression of these hsSNCs-linked genes might be affected by hsSNCs located in DA chromatin regions during brain development.

Comprehensive gene set enrichment analyses of these 8,405 genes revealed the staggering breadth of associations with physiological processes and pathological conditions of *H. sapiens*. Most significantly enriched records include more than 1,000 anatomically-distinct regions of the adult human brain, many human tissues and cell types, more than 200 common human disorders and more than 1,000 rare diseases.

Based on the reported above observations, it has been concluded that genes linked to neuro-regulatory hsSNCs appear contributing to development, morphological architecture, and biological functions of the adult human brain, other components of the central nervous system, and many tissues and organs across human

body. They were implicated in the extensive range of human physiological and pathological conditions, thus supporting the hypothesis that phenotype-altering effects of neuro-regulatory hsSNCs are not restricted to the early-stages of human brain development. Results of the analyses utilizing the Mouse Genome Informatics (MGI) database (<http://www.informatics.jax.org/>) revealed that neuro-regulatory hsSNCs-associated genes affect wide spectra of traits defining both physiology and pathology of Modern Humans, perhaps, reflecting the global scale of human-specific regulatory impacts on thousands essential mammalian phenotypes. Significantly, outlined herein analytical approaches and reported end-points provide readily available access to mouse models for precise molecular definitions of regulatory effects of neuro-regulatory human-specific SNCs and other types of HSRS on genes causally affecting thousands of defined mammalian phenotypes and hundreds of common and rare human disorders.

## **Methods**

### **Data source and analytical protocols**

#### *Candidate human-specific regulatory sequences and African Apes-specific retroviral insertions*

A total of 94,806 candidate HSRS, including 35,074 neuro-regulatory human-specific SNCs, detailed descriptions of which and corresponding references of primary original contributions are reported elsewhere (Glinsky et al., 2015-2019; Kanton et al., 2019). Solely publicly available datasets and resources were used in this contribution. The significance of the differences in the expected and observed numbers of events was calculated using two-tailed Fisher's exact test. Additional placement enrichment tests were performed for individual classes of HSRS taking into account the size in bp of corresponding genomic regions.

### **Data analysis**

#### **Categories of DNA sequence conservation**

Identification of highly-conserved in primates (pan-primate), primate-specific, and human-specific sequences was performed as previously described (Glinsky, 2015-2019). In brief, all categories were defined by direct and reciprocal mapping using LiftOver. Specifically, the following categories of candidate regulatory sequences were distinguished:

- Highly conserved in primates' sequences: DNA sequences that have at least 95% of bases remapped during conversion from/to human (*Homo sapiens*, hg38), chimp (*Pan troglodytes*, v5), and bonobo (*Pan paniscus*, v2; in specifically designated instances, *Pan paniscus*, v1 was utilized for comparisons). Similarly, highly-conserved sequences were defined for hg38 and latest releases of genomes of Gorilla, Orangutan, Gibbon, and Rhesus.
- Primate-specific: DNA sequences that failed to map to the mouse genome (mm10).
- Human-specific: DNA sequences that failed to map at least 10% of bases from human to both chimpanzee and bonobo. All candidate HSRS identified based on the sequence alignments failures to genomes of both chimpanzee and bonobo were subjected to more stringent additional analyses requiring the mapping failures to genomes of Gorilla, Orangutan, Gibbon, and Rhesus. These loci were considered created *de novo* human-specific regulatory sequences (HSRS).

To infer the putative evolutionary origins, each evolutionary classification was defined independently by running the corresponding analyses on all candidate HSRS representing the specific category. For example, human-rodent conversion identify sequences that are absent in the mouse genome based on the sequence identity threshold of 10%). Additional comparisons were performed using the same methodology and exactly as stated in the manuscript text.

### **Gene set enrichment and genome-wide proximity placement analyses**

Gene set enrichment analyses were carried-out using the Enrichr bioinformatics platform, which enables the interrogation of nearly 200,000 gene sets from more than 100 gene set libraries. The Enrichr API (January 2018 through January 2020 releases) (Chen et al., 2013; Kuleshov et al., 2016) was used to test genes linked to HSRS of interest for significant enrichment in numerous functional categories. In all tables and plots (unless stated otherwise), in addition to the nominal p values and adjusted p values, the “combined score” calculated by Enrichr is reported, which is a product of the significance estimate and the magnitude of enrichment (combined score  $c = \log(p) * z$ , where  $p$  is the Fisher’s exact test p-value and  $z$  is the z-score deviation from the expected rank). When technically feasible, larger sets of genes comprising several thousand entries were analyzed. Regulatory connectivity maps between HSRS and coding genes and additional functional enrichment analyses were performed with the GREAT algorithm (McLean et al., 2010; 2011) at default



settings. Genome-wide Proximity Placement Analysis (GPPA) of distinct genomic features co-localizing with HSRS was carried out as described previously (Glinsky, 2015-2019).

### **Mammalian Phenotype Ontology and Human Disease Ontology analyses**

To validate and extend findings afforded by the gene set enrichment analyses and to identify all genes linked with human-specific regulatory SNCs that are associated with defined mammalian phenotypes as well as implicated in development of human diseases with one or more mouse models, the additional analyses have been carried out utilizing the Mouse Genome Informatics (MGI) database (<http://www.informatics.jax.org/>).

#### *Statistical Analyses of the Publicly Available Datasets*

All statistical analyses of the publicly available genomic datasets, including error rate estimates, background and technical noise measurements and filtering, feature peak calling, feature selection, assignments of genomic coordinates to the corresponding builds of the reference human genome, and data visualization, were performed exactly as reported in the original publications and associated references linked to the corresponding data visualization tracks (<http://genome.ucsc.edu/>). Any modifications or new elements of statistical analyses are described in the corresponding sections of the Results. Statistical significance of the Pearson correlation coefficients was determined using GraphPad Prism version 6.00 software. Both nominal and Bonferroni adjusted p values were estimated. The significance of the differences in the numbers of events between the groups was calculated using two-sided Fisher's exact and Chi-square test, and the significance of the overlap between the events was determined using the hypergeometric distribution test (Tavazoie et al., 1999).

### **Supplemental Information**

Supplemental information includes Supplemental Table Sets S1 – S5, Supplemental Text, and Supplemental Figures S1-S9.

### **Author Contributions**

This is a single author contribution. All elements of this work, including the conception of ideas, formulation, and development of concepts, execution of experiments, analysis of data, and writing of the paper, were performed by the author.

## **Acknowledgements**

This work was made possible by the open public access policies of major grant funding agencies and international genomic databases and the willingness of many investigators worldwide to share their primary research data.

## References

- Barakat TS, Halbritter F, Zhang M, Rendeiro AF, Perenthaler E, Bock C, Chambers I. 2018. Functional dissection of the enhancer repertoire in human embryonic stem cells. *Cell Stem Cell*. 2018; 23: 276-288.e8. doi: 10.1016/j.stem.2018.06.014. Epub 2018 Jul 19.
- Chen EY, Tan CM, Kou Y, Duan Q, Wang Z, Meirelles GV, Clark NR, Ma'ayan A. 2013. Enrichr: interactive and collaborative HTML5 gene list enrichment analysis tool. *BMC Bioinformatics* 14, 128. doi: 10.1186/1471-2105-14-128.
- Chimpanzee Sequencing and Analysis Consortium, Initial sequence of the chimpanzee genome and comparison with the human genome. 2005. *Nature* 437, 69–87.
- Dixon JR, Selvaraj S, Yue F, Kim A, Li Y, Shen Y, Hu M, Liu JS, Ren B. 2012. Topological domains in mammalian genomes identified by analysis of chromatin interactions. *Nature* 485, 376-80.
- Glinsky GV. 2015. Transposable elements and DNA methylation create in embryonic stem cells human-specific regulatory sequences associated with distal enhancers and non-coding RNAs. *Genome Biol Evol* 7: 1432-1454.
- Glinsky GV. 2016. Mechanistically distinct pathways of divergent regulatory DNA creation contribute to evolution of human-specific genomic regulatory networks driving phenotypic divergence of *Homo sapiens*. *Genome Biol Evol* 8:2774-88.
- Glinsky GV. 2016. Activation of endogenous human stem cell-associated retroviruses (SCARs) and therapy-resistant phenotypes of malignant tumors. *Cancer Lett* 376:347-359.
- Glinsky GV. 2016. Single cell genomics reveals activation signatures of endogenous SCAR's networks in aneuploid human embryos and clinically intractable malignant tumors. *Cancer Lett* 381:176-93.

Glinsky GV. 2017. Human-specific features of pluripotency regulatory networks link NANOG with fetal and adult brain development. *BioRxiv*. <https://www.biorxiv.org/content/early/2017/06/19/022913>; doi: <https://doi.org/10.1101/022913>.

Glinsky GV. 2018. Contribution of transposable elements and distal enhancers to evolution of human-specific features of interphase chromatin architecture in embryonic stem cells. *Chromosome Res.* 2018. 26: 61-84.

Glinsky G, Durruthy-Durruthy J, Wossidlo M, Grow EJ, Weirather JL, Au KF, Wysocka J, Sebastiano V. 2018. Single cell expression analysis of primate-specific retroviruses-derived HPAT lincRNAs in viable human blastocysts identifies embryonic cells co-expressing genetic markers of multiple lineages. *Heliyon* 4: e00667. doi: 10.1016/j.heliyon.2018.e00667. eCollection 2018 Jun. PMID: 30003161.

Glinsky GV, Barakat TS. 2019. The evolution of Great Apes has shaped the functional enhancers' landscape in human embryonic stem cells. *37:101456*. PMID: 31100635. DOI: 10.1016/j.scr.2019.101456

Glinsky GV. 2019. A catalogue of 59,732 human-specific regulatory sequences reveals unique to human regulatory patterns associated with virus-interacting proteins, pluripotency and brain development. *DNA and Cell Biology*, in press.

Guffanti G, Bartlett A, Klengel T, Klengel C, Hunter R, Glinsky G, Macciardi F. 2018. Novel bioinformatics approach identifies transcriptional profiles of lineage-specific transposable elements at distinct loci in the human dorsolateral prefrontal cortex. *Mol Biol Evol.* 35: 2435-2453. PMID: 30053206. PMCID: PMC6188555. DOI: 10.1093/molbev/msy143.

Kanton S, Boyle MJ, He Z, Santel M, Weigert A, Sanchís-Calleja F, Guijarro P, Sidow L, Fleck JS, Han D, Qian Z, Heide M, Huttner WB, Khaitovich P, Pääbo S, Treutlein B, Camp JG. 2019. Organoid single-cell genomic atlas uncovers human-specific features of brain development. *Nature.* 2019; 574: 418-422. PMID: 31619793; DOI: 10.1038/s41586-019-1654-9.

King MC, Wilson AC. 1975. Evolution at two levels in humans and chimpanzees. *Science* 188: 107-116.

<https://doi.org/10.1126/science.1090005>

Kronenberg ZN, et al. 2018. High-resolution comparative analysis of great ape genomes. *Science* 360: eaar6343.

Kuleshov MV, Jones MR, Rouillard AD, Fernandez NF, Duan Q, Wang Z, Koplev S, Jenkins SL, Jagodnik KM, Lachmann A, McDermott MG, Monteiro CD, Gundersen GW, Ma'ayan A. Enrichr: a comprehensive gene set enrichment analysis web server 2016 update. *Nucleic Acids Research*. 2016; gkw377.

McLean, C.Y., Bristor, D., Hiller, M., Clarke, S.L., Schaar, B.T., Lowe, C.B., Wenger, A.M., Bejerano, G. 2011. GREAT improves functional interpretation of cis-regulatory regions. *Nat Biotechnol* 28: 495-501.

McLean CY, Reno PL, Pollen AA, Bassan AI, Capellini TD, Guenther C, Indjeian VB, Lim X, Menke DB, Schaar BT, Wenger AM, Bejerano G, Kingsley DM. 2011. Human-specific loss of regulatory DNA and the evolution of human-specific traits. *Nature* **471**: 216-9.

Nowakowski TJ et al. 2017. Spatiotemporal gene expression trajectories reveal developmental hierarchies of the human cortex. *Science* 358, 1318–1323.

Pontis J et al. 2019. Hominoid-specific transposable elements and KZFPs facilitate human embryonic genome activation and control transcription in naïve human ESCs. *Cell Stem Cell* 24, 1–12.

Theunissen TW et al. 2016. Molecular criteria for defining the naive human pluripotent state. *Cell Stem Cell* 19, 502–515.

van de Leemput J, Boles NC, Kiehl TR, Corneo B, Lederman P, Menon V, Lee C, Martinez RA, Levi BP, Thompson CL, Yao S, Kaykas A, Temple S, Fasano CA. 2014. CORTECON: a temporal transcriptome analysis of in vitro human cerebral cortex development from human embryonic stem cells. *Neuron* 83, 51-68.

**Table 1.** Associations with human physiological processes and pathological conditions of 8,405 genes linked with 35,074 human-specific single nucleotide changes (SNC) within differentially-accessible (DA) chromatin regions identified during human and chimpanzee brain development in cerebral organoids.

| <b>Database</b>                                                      | <b>Number of significant records*</b> |
|----------------------------------------------------------------------|---------------------------------------|
| <b>ARCHS4 Human Tissues</b>                                          | 39                                    |
| <b>GO Biological Process 2018</b>                                    | 392                                   |
| <b>GO Molecular Function 2018</b>                                    | 89                                    |
| <b>GO Cellular Component 2018</b>                                    | 33                                    |
| <b>KEGG 2019 Human</b>                                               | 129                                   |
| <b>KEGG 2019 Mouse</b>                                               | 106                                   |
| <b>MGI Mammalian Phenotype Level 4 2019</b>                          | 407                                   |
| <b>MGI Mammalian Phenotype 2017</b>                                  | 749                                   |
| <b>Human Phenotype Ontology</b>                                      | 298                                   |
| <b>GWAS Catalog 2019</b>                                             | 241                                   |
| <b>Rare Diseases AutoRIF Gene Lists</b>                              | 1116                                  |
| <b>Rare Diseases GeneRIF Gene Lists</b>                              | 473                                   |
| <b>Rare Diseases GeneRIF ARCHS4 Predictions</b>                      | 603                                   |
| <b>Rare Diseases AutoRIF ARCHS4 Predictions</b>                      | 641                                   |
| <b>Aging Perturbations from GEO (Up-regulated genes)</b>             | 34                                    |
| <b>Aging Perturbations from GEO (Down-regulated genes)</b>           | 67                                    |
| <b>Human Brain Regions: Allen Brain Atlas (Up-regulated genes)</b>   | 1218                                  |
| <b>Human Brain Regions: Allen Brain Atlas (Down-regulated genes)</b> | 1102                                  |
| <b>Disease Perturbations from GEO (Down-regulated genes)</b>         | 240                                   |
| <b>Disease Perturbations from GEO (Up-regulated genes)</b>           | 204                                   |
| <b>Human Database of Genotypes and Phenotype (dbGaP)</b>             | 136                                   |
| <b>DisGeNET database</b>                                             | 1313                                  |
| <b>UK Biobank GWAS v1</b>                                            | 357                                   |

Legend: \*, defined at adjusted p-value < 0.05; GEO, gene expression omnibus; GO, gene ontologies; GWAS, genome-wide association studies; ARCHS4, all RNA-seq and ChIP-seq sample and signature search; KEGG, Kyoto Encyclopedia of Genes and Genomes; MGI, mouse genome informatics;

A

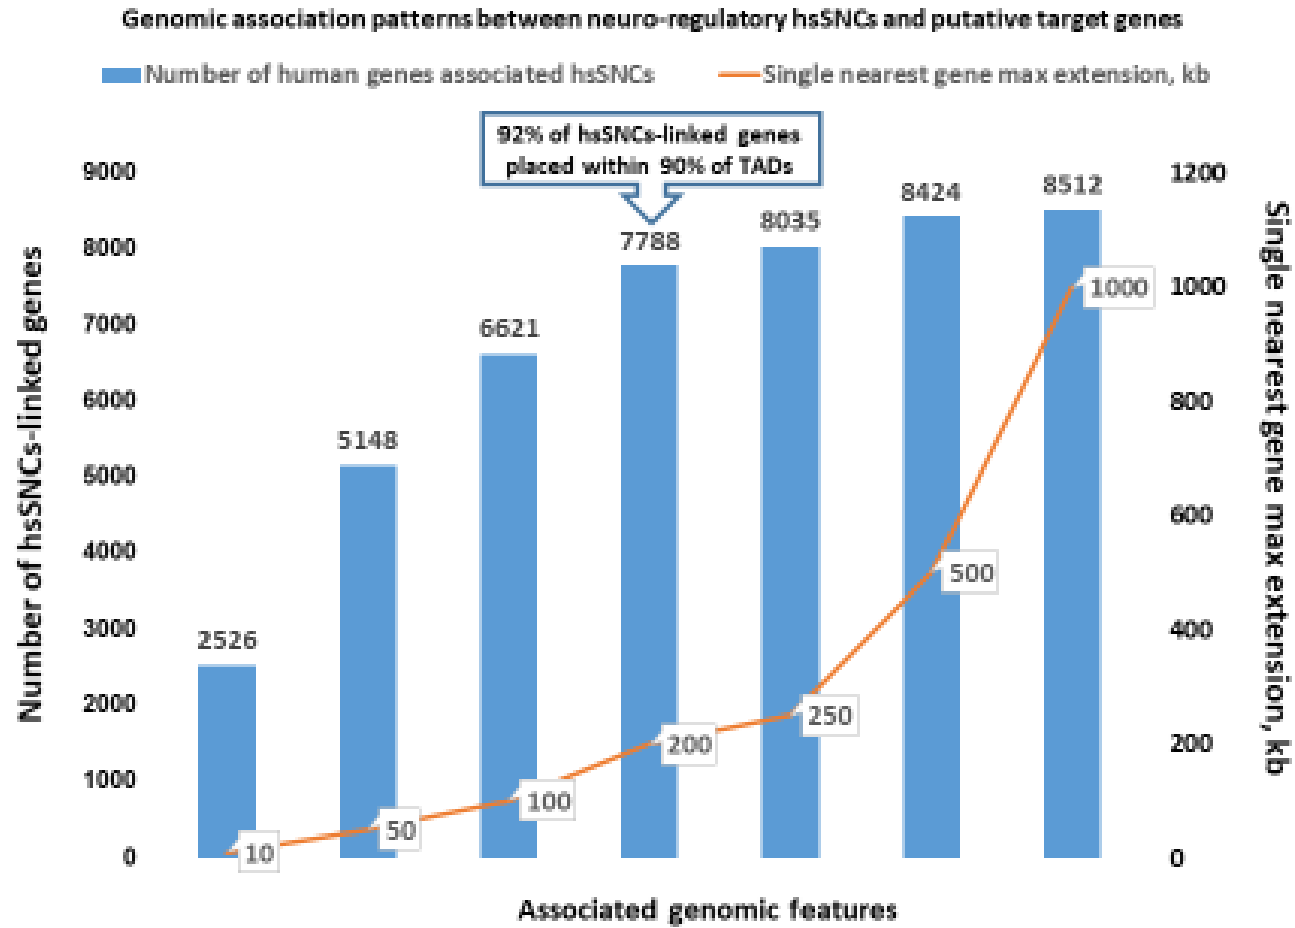

**B**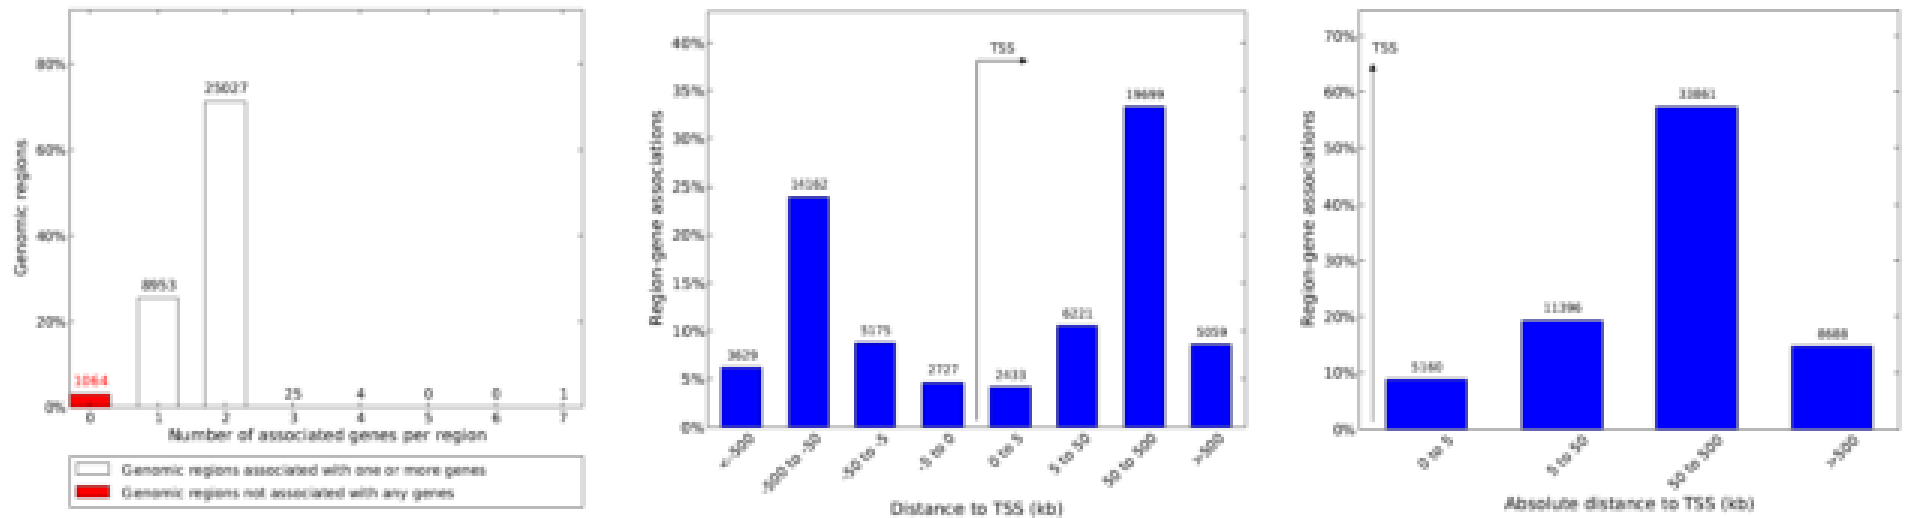

**Figure 1.** GREAT analysis identifies 8,405 human genes associated with 35,074 human-specific single nucleotide changes (SNCs) in differentially accessible (DA) chromatin regions during human and chimpanzee brain development in cerebral organoids.

- A. Patterns of genomic associations between neuro-regulatory SNCs and putative target genes defined at different single nearest gene maximum extensions.
- B. A total of 1,064 of all 35,074 SNCs (3%) are not associated with any genes in the human genome, while a total of 34,010 (97%) human-specific SNCs in DA regions appear associated with 8,405 human genes.



## **SUPPLEMENTAL FIGURES**

### ARCHS4 Human Tissues: 8,045 genes

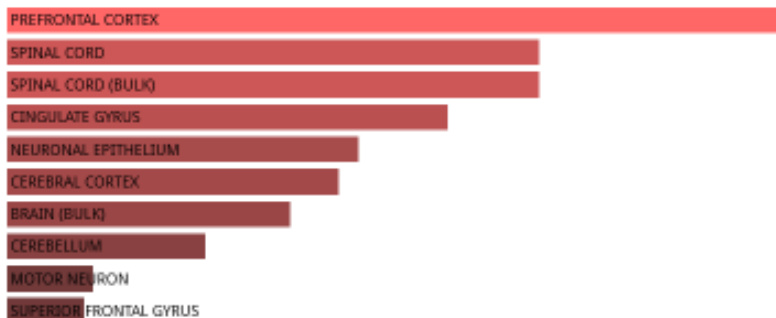

### ARCHS4 Human Tissues: 8,045 genes Top 10 of 39 significant records

| Term                   | Overlap   | P-value     | Adjusted P-value |
|------------------------|-----------|-------------|------------------|
| PREFRONTAL CORTEX      | 1348/2316 | 2.06686E-62 | 2.23E-60         |
| SPINAL CORD            | 1299/2316 | 1.17222E-47 | 4.22E-46         |
| SPINAL CORD (BULK)     | 1299/2316 | 1.17222E-47 | 4.22E-46         |
| CINGULATE GYRUS        | 1279/2316 | 3.13703E-42 | 8.47E-41         |
| NEURONAL EPITHELIUM    | 1258/2316 | 6.71385E-37 | 1.45E-35         |
| CEREBRAL CORTEX        | 1253/2316 | 1.09815E-35 | 1.98E-34         |
| BRAIN (BULK)           | 1241/2316 | 7.35673E-33 | 1.14E-31         |
| CEREBELLUM             | 1218/2316 | 8.73598E-28 | 1.18E-26         |
| MOTOR NEURON           | 1184/2316 | 4.19448E-21 | 5.03E-20         |
| SUPERIOR FRONTAL GYRUS | 1181/2316 | 1.4634E-20  | 1.58E-19         |

### Allen Brain Atlas Up: 8,045 genes

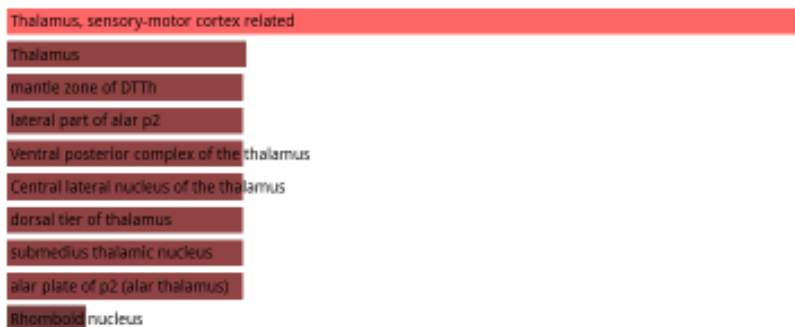

### Allen Brain Atlas Up: 8,045 genes Networks

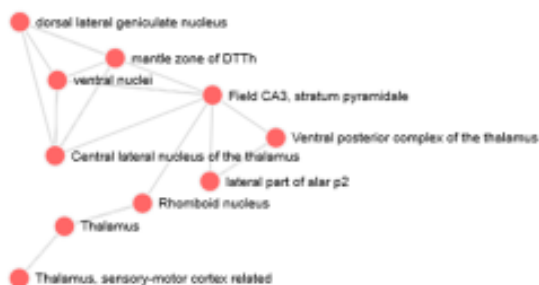

### Allen Brain Atlas Up: 8,045 genes

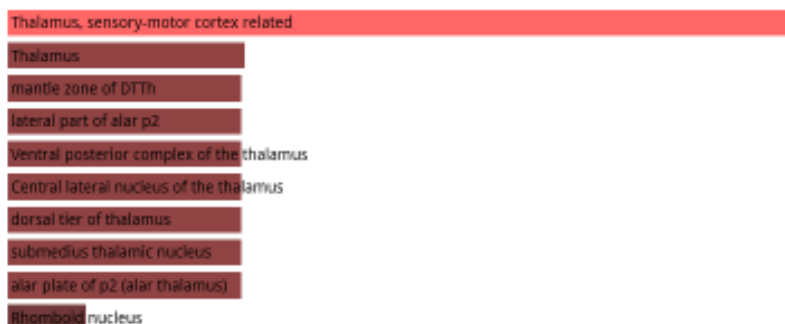

### Allen Brain Atlas Up: 8,045 genes Networks

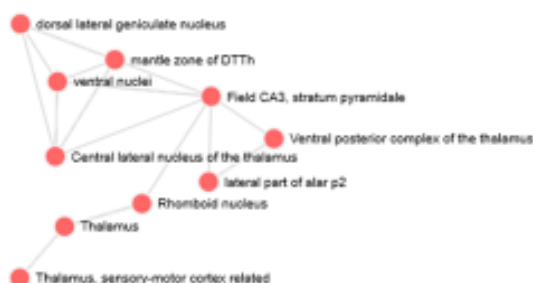

### Allen Brain Atlas Up: 8,045 genes Top 30 of 1,200 significant records

| Term                                           | Overlap | P-value  | Adjusted P-value |
|------------------------------------------------|---------|----------|------------------|
| Thalamus, sensory-motor cortex related         | 207/301 | 3.57E-21 | 7.82E-18         |
| Thalamus                                       | 222/334 | 9.71E-20 | 2.42E-17         |
| mantle zone of DTTh                            | 204/301 | 9.94E-20 | 2.42E-17         |
| lateral part of alar p2                        | 204/301 | 9.94E-20 | 2.42E-17         |
| Ventral posterior complex of the thalamus      | 204/301 | 9.94E-20 | 2.42E-17         |
| Central lateral nucleus of the thalamus        | 204/301 | 9.94E-20 | 2.42E-17         |
| alar plate of p2 (alar thalamus)               | 204/301 | 9.94E-20 | 2.42E-17         |
| submedial thalamic nucleus                     | 204/301 | 9.94E-20 | 2.42E-17         |
| dorsal tier of thalamus                        | 204/301 | 9.94E-20 | 2.42E-17         |
| Rhomboid nucleus                               | 227/345 | 2.51E-19 | 5.34E-17         |
| ventral nuclei                                 | 203/301 | 2.92E-19 | 5.34E-17         |
| Ventral group of the dorsal thalamus           | 203/301 | 2.92E-19 | 5.34E-17         |
| Field CA3, stratum pyramidale                  | 202/301 | 8.47E-19 | 1.24E-16         |
| Ventral posteromedial nucleus of the thalamus  | 202/301 | 8.47E-19 | 1.24E-16         |
| ventral posteromedial nucleus                  | 202/301 | 8.47E-19 | 1.24E-16         |
| intermediate stratum of DTTh                   | 201/301 | 2.42E-18 | 2.94E-16         |
| prosomere 2                                    | 201/301 | 2.42E-18 | 2.94E-16         |
| central lateral nucleus                        | 201/301 | 2.42E-18 | 2.94E-16         |
| dorsal lateral geniculate nucleus              | 200/301 | 6.79E-18 | 7.84E-16         |
| hilus of the DG                                | 199/301 | 1.88E-17 | 2.06E-15         |
| lateral (parvicellular) part of MD             | 198/301 | 5.13E-17 | 4.33E-15         |
| Dorsal part of the lateral geniculate complex  | 198/301 | 5.13E-17 | 4.33E-15         |
| Ventral posterolateral nucleus of the thalamus | 198/301 | 5.13E-17 | 4.33E-15         |
| posterior (ventral) nucleus                    | 198/301 | 5.13E-17 | 4.33E-15         |
| Hippocampal formation                          | 198/301 | 5.13E-17 | 4.33E-15         |
| Intralaminar nuclei                            | 198/301 | 5.13E-17 | 4.33E-15         |
| intermediate stratum of DG                     | 353/597 | 9.09E-17 | 7.38E-15         |
| Field CA3, stratum radiatum                    | 219/342 | 1.17E-16 | 9.12E-15         |
| mantle zone of CA                              | 197/301 | 1.38E-16 | 9.76E-15         |
| Thalamus, polymodal association cortex related | 197/301 | 1.38E-16 | 9.76E-15         |

### Allen Brain Atlas Down: 8,045 genes

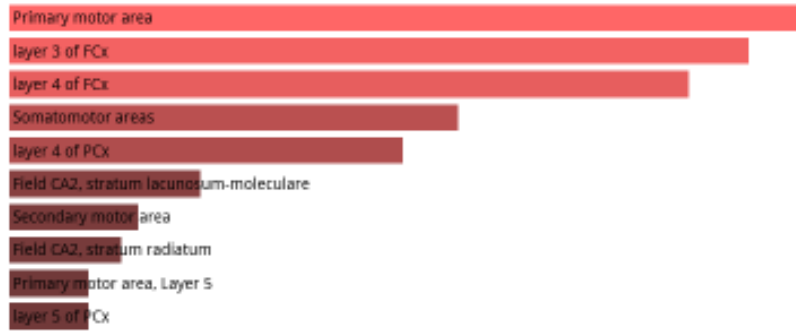

### Allen Brain Atlas Down: 8,045 genes Networks

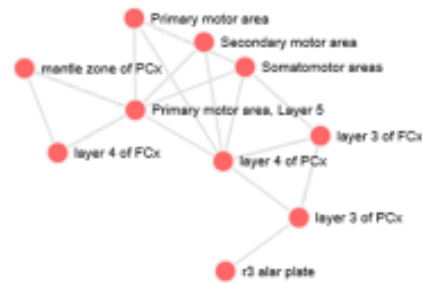

### Allen Brain Atlas Down: 8,045 genes Enriched Terms

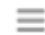

Input Genes

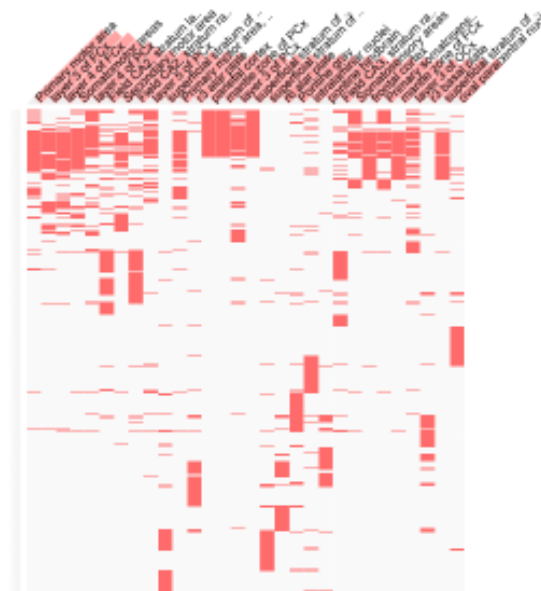

Allen Brain Atlas Down: 8,045 genes  
Top 31 of 1,062 significant records

| Term                                                      | Overlap | P-value  | Adjusted P-value |
|-----------------------------------------------------------|---------|----------|------------------|
| Primary motor area                                        | 195/300 | 5.73E-16 | 1.26E-12         |
| layer 3 of FCx                                            | 194/300 | 1.49E-15 | 1.63E-12         |
| layer 4 of FCx                                            | 193/300 | 3.81E-15 | 2.79E-12         |
| Somatomotor areas                                         | 189/300 | 1.42E-13 | 7.77E-11         |
| layer 4 of PCx                                            | 188/300 | 3.30E-13 | 1.48E-10         |
| Field CA2, stratum lacunosum-moleculare                   | 248/426 | 8.01E-12 | 2.93E-09         |
| Secondary motor area                                      | 183/300 | 2.1E-11  | 6.57E-09         |
| Field CA2, stratum radiatum                               | 262/458 | 2.75E-11 | 7.54E-09         |
| Primary motor area, Layer 5                               | 182/300 | 4.59E-11 | 9.16E-09         |
| layer 5 of PCx                                            | 182/300 | 4.59E-11 | 9.16E-09         |
| superficial stratum of m1B                                | 182/300 | 4.59E-11 | 9.16E-09         |
| r3 alar plate                                             | 181/300 | 9.92E-11 | 1.67E-08         |
| parietal cortex                                           | 181/300 | 9.92E-11 | 1.67E-08         |
| mantle zone of PCx                                        | 180/300 | 2.11E-10 | 2.44E-08         |
| layer 3 of PCx                                            | 180/300 | 2.11E-10 | 2.44E-08         |
| Pontine gray                                              | 180/300 | 2.11E-10 | 2.44E-08         |
| r6 alar plate                                             | 183/300 | 2.11E-10 | 2.44E-08         |
| superficial stratum of PCx (cortical plate/marginal zone) | 180/300 | 2.11E-10 | 2.44E-08         |
| superficial stratum of p2B                                | 180/300 | 2.11E-10 | 2.44E-08         |
| intralaminar nuclei                                       | 179/300 | 4.44E-10 | 4.64E-08         |
| pontine hindbrain                                         | 182/300 | 4.44E-10 | 4.64E-08         |
| Field CA3, stratum radiatum                               | 211/364 | 4.83E-10 | 4.81E-08         |
| Primary somatosensory area                                | 178/300 | 9.2E-10  | 8.07E-08         |
| frontal cortex                                            | 179/300 | 9.2E-10  | 8.07E-08         |
| Somatosensory areas                                       | 178/300 | 9.2E-10  | 8.07E-08         |
| mantle zone of FCx                                        | 178/300 | 1.88E-09 | 1.37E-07         |
| layer 3 of OCx                                            | 177/300 | 1.88E-09 | 1.37E-07         |
| r3 basal plate                                            | 177/300 | 1.88E-09 | 1.37E-07         |
| superficial stratum of FCx (cortical plate/marginal zone) | 178/300 | 1.88E-09 | 1.37E-07         |
| oval paracentral nucleus                                  | 177/300 | 1.88E-09 | 1.37E-07         |
| Primary motor area, Layer 2/3                             | 176/300 | 3.79E-09 | 2.6E-07          |

**Supplemental Figure S1.** Identification of genes expression of which distinguishes thousands of anatomically distinct areas of the adult human brain, various regions of the central nervous system, and many different cell types and tissues in the human body.

### Aging Perturbations from GEO up: 8,405 genes

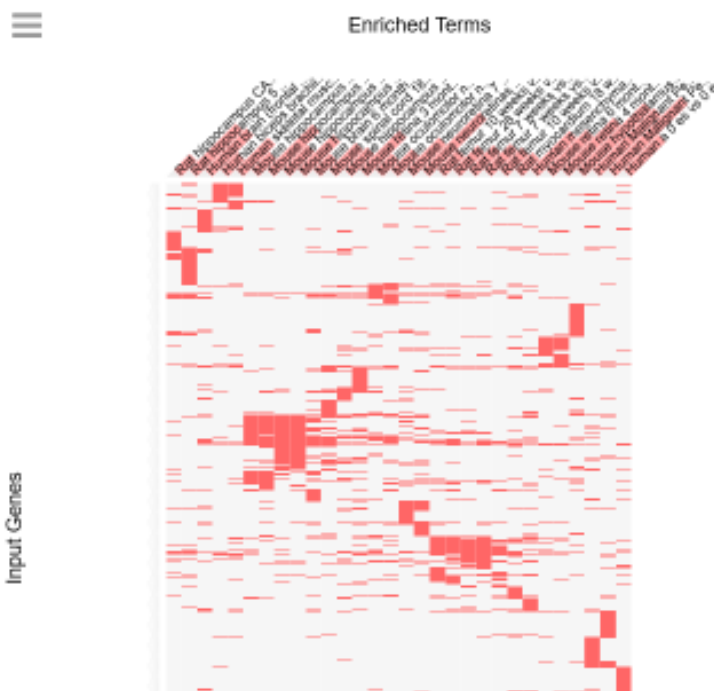

### Aging Perturbations from GEO up: 8,405 genes Top 30 significant records

| Term                                                                                    | Overlap | P-value  | Adjusted P-value |
|-----------------------------------------------------------------------------------------|---------|----------|------------------|
| Human_Malignant Peripheral Nerve Sheath Tumour_24 years vs 53 years_GSE17118_aging:364  | 197/337 | 6.9E-10  | 1.97E-07         |
| Mouse_hypothalamus_42 days vs 182 days_GDS3895_aging:107                                | 201/349 | 2.59E-09 | 3.7E-07          |
| Human_Malignant Peripheral Nerve Sheath Tumour_27 years vs 61 years_GSE17118_aging:363  | 195/343 | 1.78E-08 | 1.5E-06          |
| Mouse_neuroretinas_7 weeks vs 64 weeks_GSE38671_aging:211                               | 168/289 | 2.1E-08  | 1.5E-06          |
| Mouse_retina_4 months vs 10 months_GSE33674_aging:304                                   | 148/254 | 1.16E-07 | 6.63E-06         |
| Rat_hippocampus_3 months vs 24 months_GSE14505_aging:346                                | 230/429 | 6.82E-07 | 3.25E-05         |
| Mouse_hippocampus_9 months vs 20 months_GSE48911_aging:391                              | 243/459 | 1.23E-06 | 5.02E-05         |
| Mouse_retina_6 months vs 10 months_GSE33674_aging:305                                   | 125/218 | 3.39E-06 | 0.000121         |
| Human_brain (frontal cortex)_35 years vs 82 years_GSE53890_aging:229                    | 171/313 | 4.05E-06 | 0.000129         |
| Mouse_retina_3 months vs 16 months_GDS2654_aging:66                                     | 199/372 | 4.53E-06 | 0.00013          |
| Human_mesenchymal stem cells (from bone marrow)_42 years vs 79 years_GSE35955_aging:293 | 133/238 | 1.09E-05 | 0.000255         |
| Human_a_0 es vs 0 es_GDS5077_aging:106                                                  | 172/319 | 1.07E-05 | 0.000255         |
| Mouse_hippocampus_9 months vs 14 months_GSE48911_aging:390                              | 254/494 | 1.28E-05 | 0.000283         |
| Mouse_neuroretina_7 weeks vs 64 weeks_GSE38671_aging:210                                | 171/319 | 1.76E-05 | 0.00036          |
| Human_skeletal muscle_19 years vs 65 years_GDS4858_aging:10                             | 140/259 | 5.77E-05 | 0.0011           |
| Mouse_spinal cord_18 months vs 30 months_GDS1280_aging:1                                | 172/331 | 0.000151 | 0.002697         |
| Mouse_hippocampus_9 months vs 14 months_GSE48911_aging:384                              | 246/494 | 0.000252 | 0.004247         |
| Rat_femur_7 weeks vs 53 weeks_GDS509_aging:264                                          | 197/389 | 0.000331 | 0.005257         |
| Rat_femur_28 weeks vs 54 weeks_GDS509_aging:271                                         | 193/383 | 0.000523 | 0.007575         |
| Rat_femur_7 weeks vs 27 weeks_GDS509_aging:258                                          | 155/301 | 0.00053  | 0.007575         |
| Mouse_hippocampus_2 months vs 15 months_GSE5078_aging:398                               | 151/293 | 0.000593 | 0.008072         |
| Rat_femur_10 weeks vs 80 weeks_GDS509_aging:260                                         | 128/236 | 0.001057 | 0.013739         |
| Mouse_oculomotor nucleus_6 months vs 30 months_GDS1280_aging:6                          | 140/273 | 0.001185 | 0.01473          |
| Rat_femur_10 weeks vs 56 weeks_GDS509_aging:266                                         | 191/384 | 0.001248 | 0.014873         |
| Mouse_hippocampus_9 months vs 20 months_GSE48911_aging:385                              | 216/442 | 0.001959 | 0.022408         |
| Human_biceps brachii muscles_24 years vs 70 years_GDS4858_aging:33                      | 119/233 | 0.003152 | 0.034649         |
| Rat_myocardium_18 weeks vs 22 weeks_GDS4025_aging:142                                   | 124/244 | 0.003271 | 0.034649         |
| Rat_hippocampus CA3 region_6 months vs 25 months_GSE14724_aging:347                     | 170/345 | 0.003642 | 0.036658         |
| Mouse_brain_6 months vs 14 months_GSE15129_aging:313                                    | 189/387 | 0.003717 | 0.036658         |
| Mouse_spinal cord_6 months vs 30 months_GDS1280_aging:3                                 | 197/405 | 0.003882 | 0.037008         |

### Aging Perturbations from GEO down: 8,405 genes

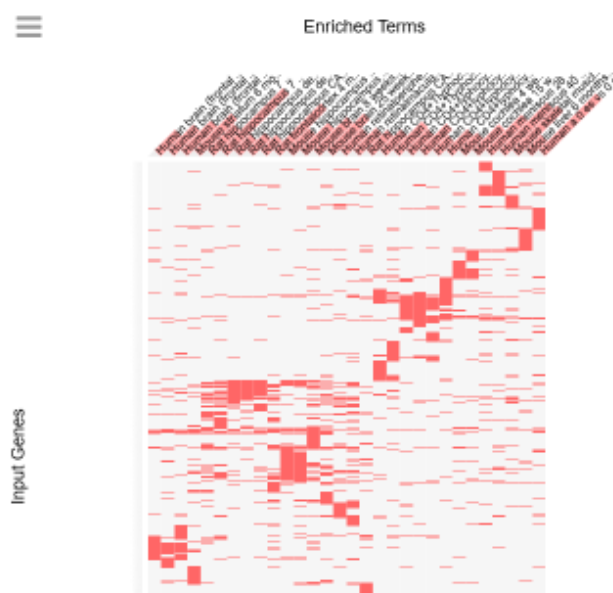

### Aging Perturbations from GEO down: 8,405 genes Top 30 significant records

| Term                                                                    | Overlap | P-value  | Adjusted P-value |
|-------------------------------------------------------------------------|---------|----------|------------------|
| Rat_hippocampus_7 months vs 21 months_GDS4019_aging:98                  | 196/314 | 1.85E-13 | 5.28E-11         |
| Human_a_0 es vs 0 es_GDS5077_aging:106                                  | 175/281 | 4.78E-12 | 6.83E-10         |
| Human_meniscus_40 years vs 55 years_GSE45233_aging:209                  | 189/320 | 4.76E-10 | 4.54E-08         |
| Rat_frontal cortex_4 months vs 22 months_GDS3939_aging:99               | 192/327 | 6.86E-10 | 4.9E-08          |
| Mouse_skeletal muscle precursor_12 months vs 24 months_GDS4892_aging:9  | 187/224 | 5.29E-09 | 3.02E-07         |
| Mouse_brain_25 weeks vs 100 weeks_GSE41018_aging:400                    | 178/311 | 3.83E-08 | 1.68E-06         |
| Mouse_striatum_6 months vs 21 months_GDS4153_aging:78                   | 164/283 | 4.12E-08 | 1.68E-06         |
| Human_meniscus_28 years vs 47 years_GSE45233_aging:208                  | 165/286 | 5.7E-08  | 2.04E-06         |
| Mouse_brain_8 weeks vs 104 weeks_GSE20411_aging:311                     | 224/408 | 8.36E-08 | 2.66E-06         |
| Human_brain (frontal cortex)_28 years vs 100 years_GSE53890_aging:228   | 197/356 | 2.32E-07 | 6.64E-06         |
| Human_CD4+Tlymphocytes_61 years vs 81 years_GSE62373_aging:185          | 193/349 | 3.26E-07 | 8.48E-06         |
| Human_CD4+lymphocytes_40 years vs 72 years_GSE62373_aging:163           | 203/373 | 7.65E-07 | 1.82E-05         |
| Mouse_hippocampus_4 months vs 9 months_GSE48911_aging:387               | 230/430 | 8.6E-07  | 1.89E-05         |
| Rat_hippocampus_7 months vs 21 months_GDS4019_aging:97                  | 156/277 | 9.95E-07 | 2.04E-05         |
| Mouse_cochlea_15 weeks vs 45 weeks_GSE35234_aging:164                   | 142/250 | 1.58E-06 | 3.01E-05         |
| Human_brain (frontal cortex)_55 years vs 82 years_GSE53890_aging:229    | 159/287 | 2.97E-06 | 5.31E-05         |
| Human_retinalmacula_18 years vs 74 years_GSE32614_aging:150             | 182/336 | 4.14E-06 | 6.96E-05         |
| Mouse_hippocampus_4 months vs 9 months_GSE48911_aging:381               | 226/429 | 4.52E-06 | 7.18E-05         |
| Human_CD4+lymphocytes_40 years vs 61 years_GSE62373_aging:160           | 192/358 | 5.84E-06 | 7.77E-05         |
| Human_CD4+Tlymphocytes_29 years vs 81 years_GSE62373_aging:176          | 201/377 | 5.44E-06 | 7.77E-05         |
| Human_CD4+lymphocytes_29 years vs 61 years_GSE62373_aging:154           | 184/342 | 6.43E-06 | 8.75E-05         |
| Human_retinalperiphery_32 years vs 74 years_GSE32614_aging:151          | 160/293 | 8.42E-06 | 0.000109         |
| Human_brain (frontal cortex)_28 years vs 82 years_GSE53890_aging:227    | 154/281 | 9.47E-06 | 0.000118         |
| Rat_hippocampus CA3 region_6 months vs 25 months_GSE14724_aging:347     | 141/255 | 1.2E-05  | 0.000143         |
| Mouse_cochlea_4 weeks vs 45 weeks_GSE35234_aging:161                    | 145/268 | 4.04E-05 | 0.000463         |
| Rat_hippocampus dentate gyrus_18 months vs 28 months_GSE21681_aging:357 | 124/225 | 4.78E-05 | 0.000522         |
| Rat_hippocampus dentate gyrus_18 months vs 28 months_GSE21681_aging:358 | 147/273 | 4.93E-05 | 0.000528         |
| Human_CD4+lymphocytes_40 years vs 81 years_GSE62373_aging:165           | 197/380 | 6.24E-05 | 0.000638         |
| Human_CD4+lymphocytes_29 years vs 81 years_GSE62373_aging:156           | 215/419 | 6.73E-05 | 0.000664         |
| Rat_hippocampus CA1_18 months vs 28 months_GSE21681_aging:353           | 144/270 | 0.000107 | 0.001004         |

**Supplemental Figure S2.** Identification and characterization of genes expression of which is altered during aging of humans, rats, and mice.

### Human Phenotype Ontology: 8,405 genes

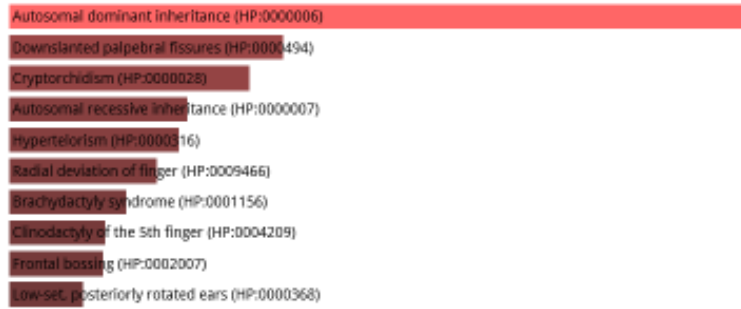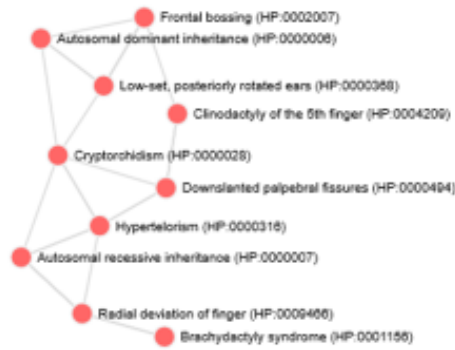

### Human Phenotype Ontology: 8,405 genes

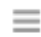

#### Enriched Terms

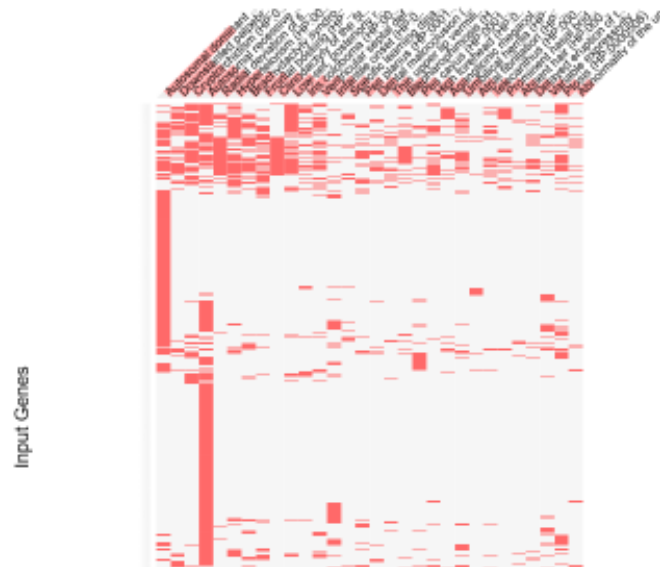



### Human Phenotype Ontology (8,405 genes): Top 35 of 298 significant records

| Term                                          | Overlap  | P-value  | Adjusted P-value |
|-----------------------------------------------|----------|----------|------------------|
| Autosomal dominant inheritance (HP:000006)    | 645/1134 | 2.85E-25 | 5.07E-22         |
| Downslanted palpebral fissures (HP:000494)    | 127/188  | 1.17E-12 | 1.04E-09         |
| Cryptorchidism (HP:000028)                    | 222/379  | 4.46E-11 | 2.64E-08         |
| Autosomal recessive inheritance (HP:000007)   | 840/1722 | 1.14E-10 | 5.07E-08         |
| Radial deviation of finger (HP:000466)        | 140/229  | 3.75E-09 | 1.11E-06         |
| Hypertelorism (HP:000316)                     | 190/328  | 3.70E-09 | 1.11E-06         |
| Brachydactyly syndrome (HP:000115)            | 119/192  | 1.77E-08 | 4.5E-06          |
| Frontal bossing (HP:000207)                   | 129/213  | 3.38E-08 | 7.51E-06         |
| Clinodactyly of the 5th finger (HP:000420)    | 118/192  | 4.03E-08 | 7.90E-06         |
| Low-set, posteriorly rotated ears (HP:000308) | 158/276  | 2.14E-07 | 3.8E-05          |
| Iris coloboma (HP:000012)                     | 72/110   | 5.77E-07 | 9.34E-05         |
| Ventricular septal defect (HP:000162)         | 106/176  | 7.99E-07 | 0.000113         |
| Infantile onset (HP:000359)                   | 145/254  | 8.28E-07 | 0.000113         |
| Specific learning disability (HP:000132)      | 36/47    | 1.49E-06 | 0.000189         |
| Pes planus (HP:000176)                        | 68/105   | 2.09E-06 | 0.000246         |
| Dental malocclusion (HP:000068)               | 55/81    | 2.21E-06 | 0.000246         |
| Thin upper lip vermillion (HP:000219)         | 38/51    | 2.5E-06  | 0.000261         |
| Blepharophimosis (HP:000058)                  | 67/104   | 3.20E-06 | 0.000323         |
| Pes cavus (HP:000170)                         | 80/129   | 3.55E-06 | 0.000323         |
| High forehead (HP:000348)                     | 69/108   | 3.63E-06 | 0.000323         |
| Aganglionic megacolon (HP:000225)             | 61/97    | 4.26E-06 | 0.000361         |
| Umbilical hernia (HP:000153)                  | 91/151   | 4.5E-06  | 0.000364         |
| Atrial fibrillation (HP:000511)               | 26/32    | 6.52E-06 | 0.000505         |
| Telecanthus (HP:000050)                       | 55/83    | 6.96E-06 | 0.000516         |
| Prominent nasal bridge (HP:000426)            | 64/100   | 7.43E-06 | 0.000529         |
| Absent hair (HP:000298)                       | 18/20    | 1.14E-05 | 0.000781         |
| Delayed eruption of teeth (HP:000084)         | 56/86    | 1.28E-05 | 0.000841         |
| Variable expressivity (HP:000382)             | 86/144   | 1.34E-05 | 0.00085          |
| Ptosis (HP:000058)                            | 180/338  | 1.79E-05 | 0.001074         |
| Abnormality of the upper arm (HP:000145)      | 29/38    | 1.81E-05 | 0.001074         |
| Progressive disorder (HP:000367)              | 86/145   | 1.94E-05 | 0.001103         |
| Depressed nasal bridge (HP:000528)            | 127/228  | 1.99E-05 | 0.001103         |
| Sporadic (HP:000374)                          | 42/61    | 2.05E-05 | 0.001103         |
| Left ventricular hypertrophy (HP:000171)      | 31/42    | 2.93E-05 | 0.0015           |
| Postaxial hand polydactyly (HP:000162)        | 53/82    | 2.95E-05 | 0.0015           |

### Database of Human Genotypes and Phenotypes (dbGaP): 8,405 genes

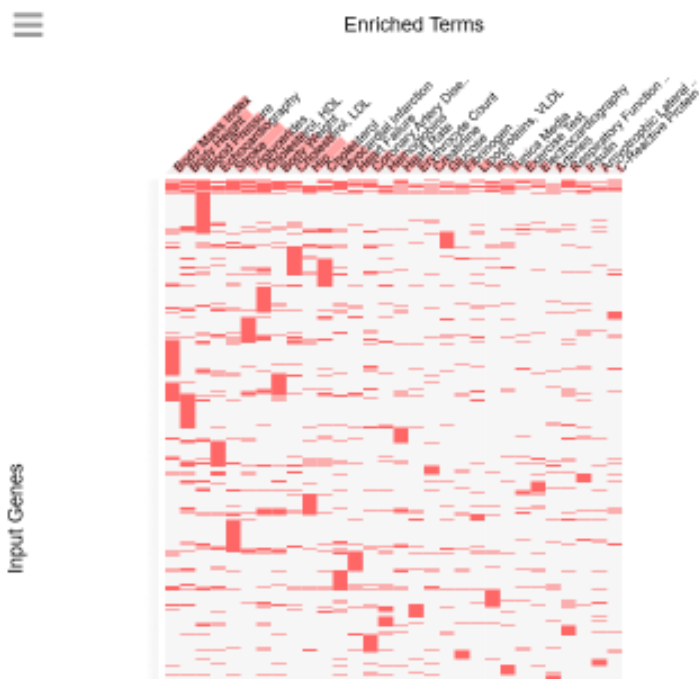

**Database of Human Genotypes and Phenotypes (dbGaP): 8,405 genes**  
**Top 20 of 136 significant records**

| Term                    | Overlap | P-value  | Adjusted P-value |
|-------------------------|---------|----------|------------------|
| Body Mass Index         | 313/437 | 1.02E-36 | 3.46E-34         |
| Body Height             | 276/385 | 1.32E-32 | 2.23E-30         |
| Blood Pressure          | 310/454 | 3.19E-30 | 3.59E-28         |
| Echocardiography        | 204/273 | 2.47E-28 | 2.08E-26         |
| Stroke                  | 211/289 | 6.02E-27 | 4.07E-25         |
| Triglycerides           | 180/244 | 4.77E-24 | 2.68E-22         |
| Cholesterol, HDL        | 242/357 | 3.57E-23 | 1.72E-21         |
| Body Weight             | 161/216 | 1.91E-22 | 8.05E-21         |
| Cholesterol, LDL        | 210/304 | 7.78E-22 | 2.92E-20         |
| Hip                     | 151/202 | 2.39E-21 | 8.06E-20         |
| Cholesterol             | 183/268 | 2.28E-18 | 7.02E-17         |
| Myocardial Infarction   | 157/229 | 3.32E-16 | 9.36E-15         |
| Coronary Artery Disease | 140/205 | 2.16E-14 | 5.31E-13         |
| Heart Failure           | 130/187 | 2.2E-14  | 5.31E-13         |
| Hemoglobins             | 113/157 | 2.38E-14 | 5.37E-13         |
| Erythrocyte Count       | 87/115  | 2.09E-13 | 4.41E-12         |
| Heart Rate              | 110/155 | 2.47E-13 | 4.86E-12         |
| Creatinine              | 73/92   | 2.59E-13 | 4.86E-12         |
| Fibrinogen              | 69/86   | 4.29E-13 | 7.05E-12         |
| Lipoproteins, VLDL      | 69/86   | 4.29E-13 | 7.05E-12         |

**GWAS Catalog 2019: 8,405 genes**

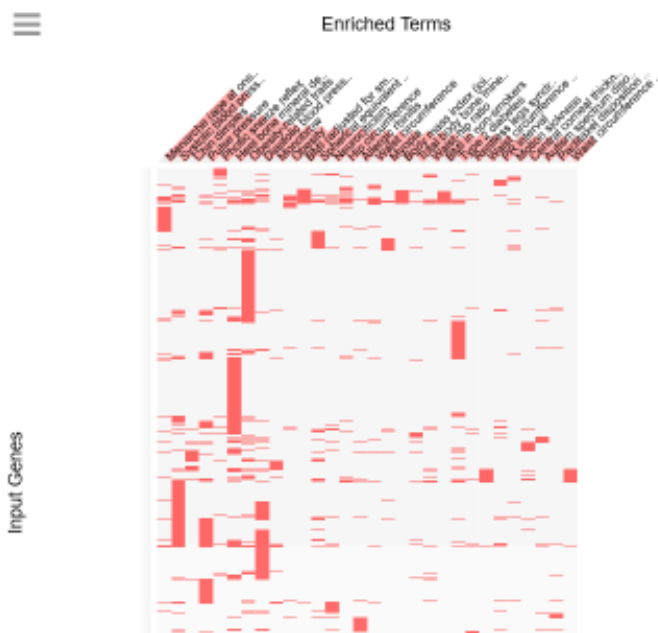

**GWAS Catalog 2019 (8,405 genes): Top 40 of 241 significant records**

| Term                                                                                       | Overlap | P-value  | Adjusted P-value |
|--------------------------------------------------------------------------------------------|---------|----------|------------------|
| Menarche (age at onset)                                                                    | 154/212 | 1.12E-19 | 1.4E-16          |
| Systolic blood pressure                                                                    | 389/637 | 1.02E-19 | 1.4E-16          |
| Chin dimples                                                                               | 62/74   | 1.51E-13 | 8.68E-11         |
| Puke pressure                                                                              | 321/567 | 9.66E-13 | 4.16E-10         |
| Photic sneeze reflex                                                                       | 55/65   | 1.6E-12  | 5.51E-10         |
| Heel bone mineral density                                                                  | 478/898 | 3.09E-12 | 8.88E-10         |
| Obesity-related traits                                                                     | 427/804 | 6.98E-11 | 1.72E-08         |
| Diastolic blood pressure                                                                   | 348/646 | 4.87E-10 | 1.05E-07         |
| Monobrow                                                                                   | 58/76   | 1.19E-09 | 2.28E-07         |
| Obesity                                                                                    | 45/55   | 1.61E-09 | 2.78E-07         |
| Height                                                                                     | 288/527 | 2.32E-09 | 3.63E-07         |
| Atrial fibrillation                                                                        | 146/240 | 2.83E-09 | 3.78E-07         |
| BMI (adjusted for smoking behaviour)                                                       | 58/77   | 2.85E-09 | 3.78E-07         |
| Spherical equivalent or myopia (age of diagnosis)                                          | 120/191 | 4.87E-09 | 5.99E-07         |
| Neuroticism                                                                                | 69/97   | 5.87E-09 | 6.74E-07         |
| Hip circumference                                                                          | 52/69   | 1.83E-08 | 1.97E-06         |
| Divergular disease                                                                         | 100/156 | 2.04E-08 | 2.06E-06         |
| Allergic rhinitis                                                                          | 77/114  | 3.13E-08 | 3E-06            |
| Waist circumference                                                                        | 55/75   | 3.67E-08 | 3.33E-06         |
| Myopia                                                                                     | 52/70   | 4.2E-08  | 3.62E-06         |
| Body mass index (joint analysis main effects and smoking interaction)                      | 56/77   | 4.5E-08  | 3.69E-06         |
| Hand grip strength                                                                         | 99/156  | 5.05E-08 | 3.96E-06         |
| Total body bone mineral density                                                            | 31/36   | 5.77E-08 | 4.32E-06         |
| Waist-hip ratio                                                                            | 44/58   | 1.05E-07 | 1.14E-05         |
| BMI in non-smokers                                                                         | 44/58   | 1.05E-07 | 1.14E-05         |
| Type 2 diabetes                                                                            | 217/397 | 2.08E-07 | 1.38E-05         |
| Restless legs syndrome                                                                     | 32/39   | 3.48E-07 | 2.22E-05         |
| Blond vs. brown/black hair color                                                           | 98/160  | 6.8E-07  | 4.25E-05         |
| Waist circumference adjusted for BMI (adjusted for smoking behaviour)                      | 56/81   | 7.31E-07 | 4.29E-05         |
| Amniontic lateral sclerosis (sporadic)                                                     | 109/182 | 8.3E-07  | 4.77E-05         |
| PR interval                                                                                | 48/67   | 8.6E-07  | 4.78E-05         |
| Motion sickness                                                                            | 27/32   | 1.01E-06 | 5.45E-05         |
| Male-pattern baldness                                                                      | 143/251 | 1.15E-06 | 6E-05            |
| Central corneal thickness                                                                  | 47/66   | 1.48E-06 | 7.14E-05         |
| PdRFAel disposition in epithelial ovarian cancer                                           | 36/47   | 1.49E-06 | 7.14E-05         |
| Autism spectrum disorder, ADHD, bipolar disorder, MDD, and schizophrenia (combined)        | 36/47   | 1.49E-06 | 7.14E-05         |
| Rosacea symptom severity                                                                   | 87/141  | 1.84E-06 | 8.57E-05         |
| Waist circumference adjusted for BMI (joint analysis main effects and smoking interaction) | 54/79   | 1.98E-06 | 8.39E-05         |
| Waist circumference adjusted for body mass index                                           | 80/128  | 2.29E-06 | 0.000101         |
| Glaucoma (primary open-angle)                                                              | 52/76   | 2.92E-06 |                  |

**Supplemental Figure S3.** Identification of genes implicated in development and manifestations of hundreds physiological and pathological phenotypes and autosomal inheritance in Modern Humans.

### Disease Perturbations from GEO down: 8,405 genes

- schizophrenia DOID-5419 human GSE25673 sample 892
- Bipolar Disorder C0005586 human GSE5389 sample 302
- esophagus squamous cell carcinoma DOID-3748 human GSE63941 sample 659
- Crohn's disease DOID-8778 human GSE6731 sample 757
- ulcerative colitis DOID-8577 human GSE6731 sample 759
- esophagus squamous cell carcinoma DOID-3748 human GSE63941 sample 658
- schizophrenia DOID-5419 human GSE25673 sample 891
- idiopathic pulmonary fibrosis DOID-0050156 human GSE44723 sample 850
- Androgen insensitivity syndrome C0039585 human GSE3871 sample 415
- adrenoleukodystrophy DOID-10588 human GSE34309 sample 864

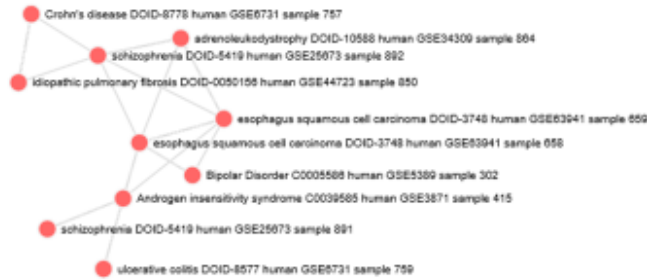

### Disease Perturbations from GEO down: 8,405 genes

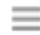

#### Enriched Terms

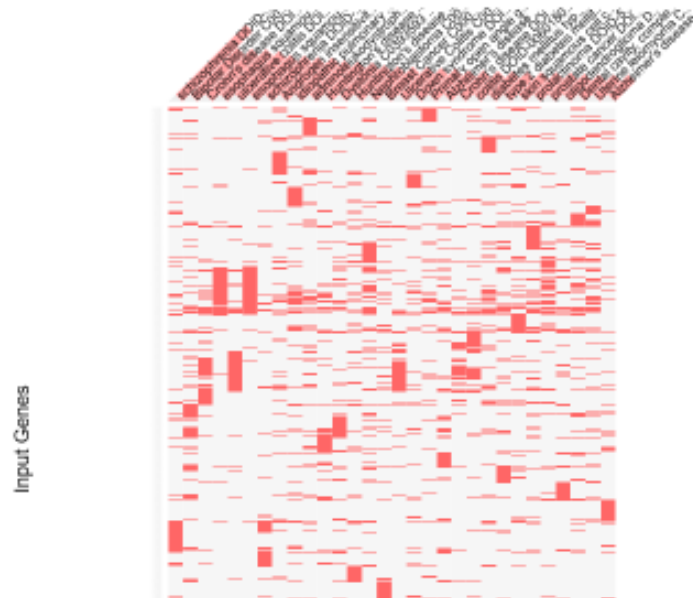

### Disease Perturbations from GEO down (8,405 genes): Top 30 of 240 significant records

| Term                                                                  | Overlap | P-value  | Adjusted P-value |
|-----------------------------------------------------------------------|---------|----------|------------------|
| schizophrenia DOID-5419 human GSE25673 sample 892                     | 242/337 | 6.49E-29 | 5.44E-26         |
| Bipolar Disorder C0005586 human GSE5389 sample 302                    | 256/395 | 2.78E-20 | 1.17E-17         |
| esophagus squamous cell carcinoma DOID-3748 human GSE63941 sample 659 | 252/391 | 1.65E-19 | 4.6E-17          |
| Crohn's disease DOID-8778 human GSE6731 sample 757                    | 240/370 | 3.64E-19 | 7.63E-17         |
| ulcerative colitis DOID-8577 human GSE6731 sample 759                 | 246/384 | 1.4E-18  | 2.34E-16         |
| esophagus squamous cell carcinoma DOID-3748 human GSE63941 sample 658 | 256/408 | 1.43E-17 | 2E-15            |
| schizophrenia DOID-5419 human GSE25673 sample 891                     | 182/274 | 2.18E-16 | 2.61E-14         |
| idiopathic pulmonary fibrosis DOID-0050156 human GSE44723 sample 850  | 201/312 | 8.28E-16 | 8.68E-14         |
| Androgen insensitivity syndrome C0039585 human GSE3871 sample 415     | 208/327 | 1.94E-15 | 1.81E-13         |
| adrenoleukodystrophy DOID-10588 human GSE34309 sample 864             | 212/338 | 9.23E-15 | 7.75E-13         |
| Huntington's disease DOID-12858 mouse GSE3621 sample 704              | 219/356 | 6.55E-14 | 5E-12            |
| Dystonia C0393593 human GSE3064 sample 329                            | 198/317 | 1.27E-13 | 8.89E-12         |
| Nephroblastoma C0027708 human GSE2712 sample 418                      | 248/419 | 6.95E-13 | 4.48E-11         |
| Huntington's disease DOID-12858 mouse GSE3583 sample 929              | 183/293 | 1.08E-12 | 6.44E-11         |
| Ulcerative Colitis C0009324 human GSE6731 sample 249                  | 213/354 | 3.26E-12 | 1.82E-10         |
| Breast Cancer C0006142 human GSE1378 sample 52                        | 184/299 | 6.23E-12 | 3.27E-10         |
| Down syndrome DOID-14250 human GSE42956 sample 1060                   | 156/247 | 1.41E-11 | 6.95E-10         |
| Primary open angle glaucoma C0339573 human GSE2705 sample 257         | 156/249 | 3.5E-11  | 1.63E-09         |
| colitis DOID-0060180 human GSE6731 sample 761                         | 211/359 | 8.78E-11 | 3.71E-09         |
| Alzheimer's disease DOID-10652 human GSE4757 sample 592               | 216/369 | 8.85E-11 | 3.71E-09         |
| Crohn's disease DOID-8778 human GSE6731 sample 758                    | 162/263 | 1.01E-10 | 4.01E-09         |
| prolactinoma DOID-5394 human GSE36314 sample 636                      | 251/440 | 1.05E-10 | 4.01E-09         |
| diabetes mellitus type 2 DOID-9352 human GSE12643 sample 766          | 204/346 | 1.22E-10 | 4.34E-09         |
| type 2 diabetes mellitus DOID-9352 human GSE13760 sample 882          | 221/380 | 1.24E-10 | 4.34E-09         |
| skin squamous cell carcinoma DOID-3151 human GSE45164 sample 657      | 177/295 | 2.98E-10 | 1E-08            |
| prostate cancer DOID-10283 human GSE3868 sample 638                   | 201/344 | 4.9E-10  | 1.58E-08         |
| Dental cavity, complex C0399396 human GSE1629 sample 175              | 228/401 | 1.12E-09 | 3.49E-08         |
| Alzheimer's disease DOID-10652 human GSE36980 sample 520              | 190/325 | 1.37E-09 | 4.1E-08          |
| oligodendroglioma DOID-3181 human GSE15824 sample 858                 | 183/313 | 2.71E-09 | 7.83E-08         |
| breast cancer DOID-1612 human GSE3744 sample 978                      | 247/443 | 2.84E-09 | 7.95E-08         |

### Disease Perturbations from GEO up: 8,405 genes

- Spinal Muscular Atrophy C0026847 mouse GSE10599 sample 235
- Down Syndrome C0013080 human GSE5390 sample 277
- schizophrenia DOID-5419 human GSE25673 sample 891
- Cardiomyopathy, Dilated C0007193 human GSE3585 sample 198
- Primary open angle glaucoma C0339573 human GSE2705 sample 257
- Diamond-Blackfan anaemia DOID-1339 human GSE14335 sample 472
- idiopathic pulmonary fibrosis DOID-0050156 human GSE44723 sample 851
- schizophrenia DOID-5419 human GSE25673 sample 892
- adrenoleukodystrophy DOID-10588 human GSE34309 sample 864
- idiopathic pulmonary fibrosis DOID-0050156 human GSE44723 sample 850

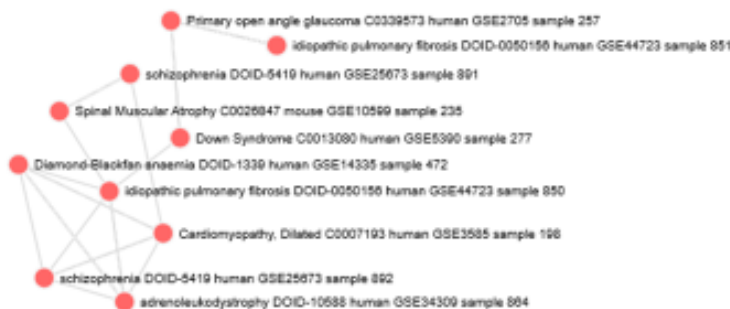

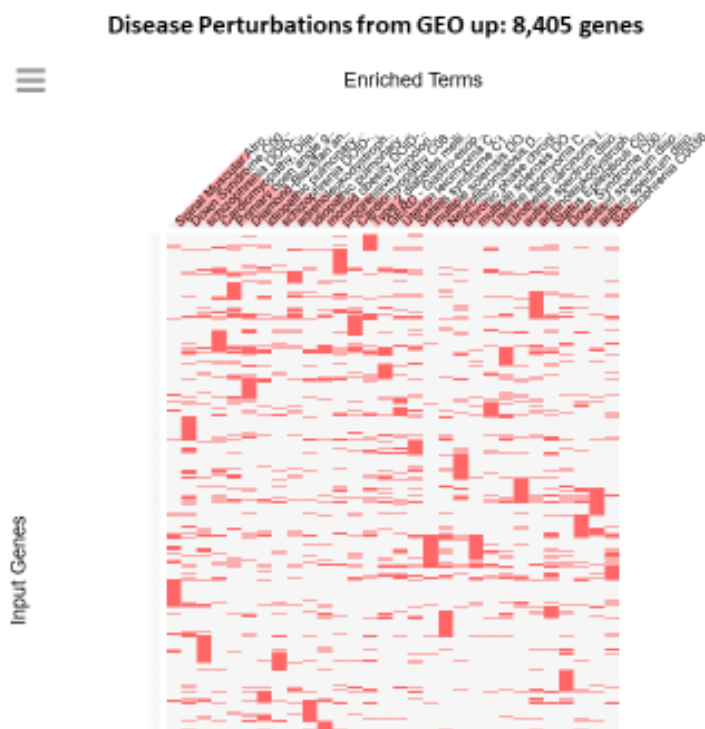

**Disease Perturbations from GEO up (8,405 genes): Top 30 of 204 significant records**

| Term                                                                          | Overlap | P-value  | Adjusted P-value |
|-------------------------------------------------------------------------------|---------|----------|------------------|
| Spinal Muscular Atrophy C0026847 mouse GSE10599 sample 235                    | 254/368 | 4.69E-26 | 3.93E-23         |
| Down Syndrome C0013080 human GSE5390 sample 277                               | 288/460 | 2.08E-19 | 8.72E-17         |
| schizophrenia DOID-5419 human GSE25673 sample 891                             | 215/326 | 1.48E-18 | 4.14E-16         |
| Cardiomyopathy, Dilated C0007193 human GSE3585 sample 198                     | 209/326 | 4.82E-16 | 1.01E-13         |
| Primary open angle glaucoma C0339573 human GSE2705 sample 257                 | 216/351 | 9.23E-14 | 1.55E-11         |
| Diamond-Blackfan anaemia DOID-1339 human GSE14335 sample 472                  | 231/382 | 1.88E-13 | 2.64E-11         |
| idiopathic pulmonary fibrosis DOID-0050156 human GSE44723 sample 851          | 185/300 | 4.2E-12  | 5.03E-10         |
| schizophrenia DOID-5419 human GSE25673 sample 892                             | 165/263 | 8.13E-12 | 8.53E-10         |
| adrenoleukodystrophy DOID-10588 human GSE34309 sample 864                     | 164/262 | 1.23E-11 | 1.14E-09         |
| idiopathic pulmonary fibrosis DOID-0050156 human GSE44723 sample 850          | 177/288 | 1.83E-11 | 1.5E-09          |
| morbid obesity DOID-11981 human GSE48964 sample 583                           | 180/294 | 1.96E-11 | 1.5E-09          |
| Cardiomyopathy C0878544 human GSE1869 sample 79                               | 197/330 | 5.63E-11 | 3.87E-09         |
| Type 2 diabetes mellitus C0011860 human GSE12643 sample 274                   | 205/346 | 5.99E-11 | 3.87E-09         |
| GERD - Gastro-esophageal reflux disease C0017168 human GSE2144 sample 27      | 203/346 | 2.46E-10 | 1.48E-08         |
| Uterine leiomyoma C0042133 human GSE2725 sample 399                           | 158/258 | 3.19E-10 | 1.78E-08         |
| multiple sclerosis DOID-2377 human GSE38010 sample 737                        | 183/310 | 9.47E-10 | 4.96E-08         |
| Chronic phase chronic myelogenous leukemia DOID-8552 human GSE5550 sample 456 | 192/330 | 1.92E-09 | 9.47E-08         |
| autism spectrum disorder DOID-0060041 human GSE28521 sample 1041              | 185/317 | 2.71E-09 | 1.26E-07         |
| Setleis syndrome C1744559 human GSE16524 sample 285                           | 222/393 | 4E-09    | 1.77E-07         |
| Neurofibromatosis DOID-8712 mouse GSE1482 sample 667                          | 210/369 | 4.54E-09 | 1.9E-07          |
| multiple sclerosis DOID-2377 human GSE38010 sample 738                        | 180/309 | 5.36E-09 | 2.14E-07         |
| Uterine leiomyoma C0042133 human GSE593 sample 16                             | 160/270 | 7.23E-09 | 2.76E-07         |
| autism spectrum disorder DOID-0060041 human GSE28521 sample 1040              | 194/341 | 1.8E-08  | 6.56E-07         |
| Urothelial carcinoma in situ C0334267 human GSE3167 sample 229                | 213/380 | 1.94E-08 | 6.77E-07         |
| Status Epilepticus C0038220 rat GSE4236 sample 391                            | 191/336 | 2.51E-08 | 8.11E-07         |
| autism spectrum disorder DOID-0060041 human GSE28521 sample 1039              | 191/336 | 2.51E-08 | 8.11E-07         |
| adrenoleukodystrophy DOID-10588 human GSE34308 sample 709                     | 205/365 | 2.88E-08 | 8.95E-07         |
| Down Syndrome C0013080 human GSE10758 sample 310                              | 210/376 | 3.57E-08 | 1.07E-06         |
| chronic lymphocytic leukemia DOID-1040 human GSE6691 sample 786               | 180/315 | 3.77E-08 | 1.09E-06         |
| Oligodendroglioma C0028945 human GSE2223 sample 116                           | 167/289 | 4.08E-08 | 1.14E-06         |

**Supplemental Figure S4.** Identification of genes expression of which is altered in several hundred common human disorders.

### Rare Diseases GeneRIF Gene Lists: 8,405 genes

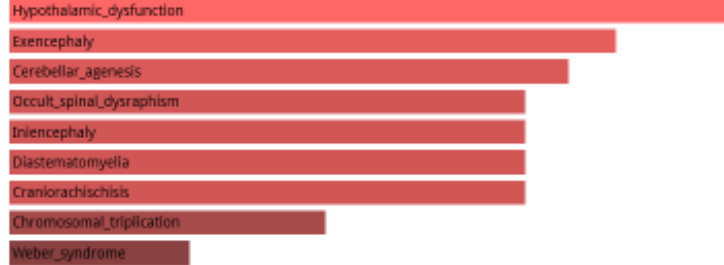

**Cluttering**

**Top 20 of 473 significant records**

| Term                            | Overlap | P-value  | Adjusted P-value |
|---------------------------------|---------|----------|------------------|
| Hypothalamic_dysfunction        | 90/128  | 8.12E-11 | 6.55E-08         |
| Exencephaly                     | 158/256 | 1.38E-10 | 6.55E-08         |
| Cerebellar_agenesis             | 198/335 | 1.7E-10  | 6.55E-08         |
| Occult_spinal_dysraphism        | 157/255 | 2.05E-10 | 6.55E-08         |
| Diastematomyelia                | 157/255 | 2.05E-10 | 6.55E-08         |
| Craniorachischisis              | 157/255 | 2.05E-10 | 6.55E-08         |
| Iniencephaly                    | 157/255 | 2.05E-10 | 6.55E-08         |
| Chromosomal_triplication        | 201/344 | 4.9E-10  | 1.37E-07         |
| Weber_syndrome                  | 94/130  | 8.85E-10 | 2.2E-07          |
| Cluttering                      | 106/162 | 1.41E-09 | 3.16E-07         |
| Mental_retardation_epilepsy     | 190/326 | 1.92E-09 | 3.9E-07          |
| Single_ventricular_heart        | 73/104  | 5.49E-09 | 1.02E-06         |
| Sydenham's_chorea               | 209/369 | 8.42E-09 | 1.34E-06         |
| Chorea_minor                    | 209/369 | 8.42E-09 | 1.34E-06         |
| Antisocial_personality_disorder | 46/59   | 1.93E-08 | 2.87E-06         |
| Sudden_infant_death_syndrome    | 103/162 | 2.37E-08 | 3.31E-06         |
| Stress_cardiomyopathy           | 110/176 | 3.16E-08 | 4.16E-06         |
| N_syndrome                      | 222/401 | 3.89E-08 | 4.83E-06         |
| Basilar_migraine                | 127/210 | 4.85E-08 | 5.7E-06          |
| Corpus_callosum_agenesis        | 80/138  | 7.92E-08 | 8.85E-06         |

### Rare Diseases GeneRIF Gene Lists: 8,405 genes

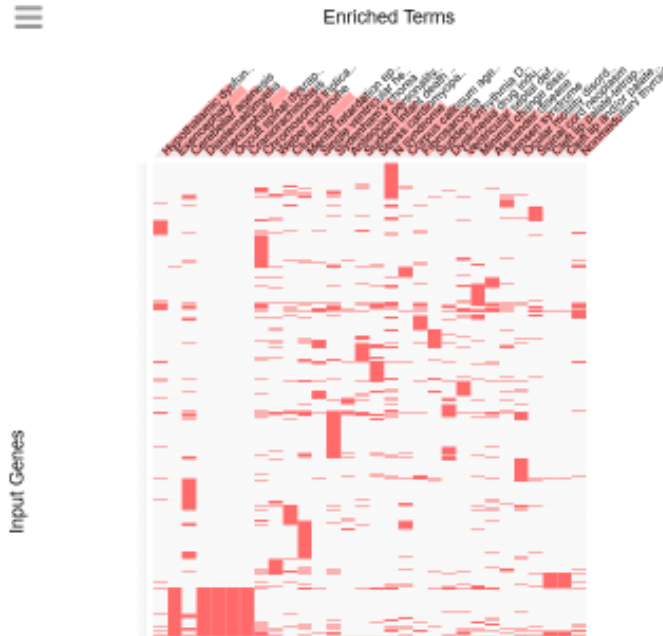

### Rare Diseases GenerIF ARCHS4 Predictions: 8,405 genes

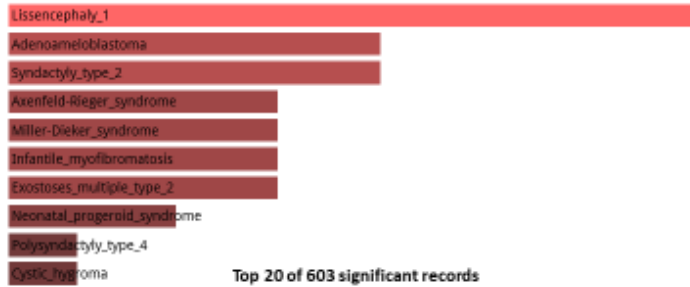

**Top 20 of 603 significant records**

| Term                                         | Overlap | P-value  | Adjusted P-value |
|----------------------------------------------|---------|----------|------------------|
| Lissencephaly_1                              | 154/200 | 4.79E-24 | 1.08E-20         |
| Adenoameloblastoma                           | 151/200 | 4.35E-22 | 3.20E-19         |
| Syndactyly_type_2                            | 151/200 | 4.35E-22 | 3.20E-19         |
| Axenfeld-Rieger_syndrome                     | 150/200 | 1.85E-21 | 5.94E-19         |
| Miller-Dieker_syndrome                       | 150/200 | 1.85E-21 | 5.94E-19         |
| Exostoses_multiple_type_2                    | 150/200 | 1.85E-21 | 5.94E-19         |
| Infantile_myofibromatosis                    | 150/200 | 1.85E-21 | 5.94E-19         |
| Neonatal_progeroid_syndrome                  | 149/200 | 7.60E-21 | 2.16E-18         |
| Polysyndactyly_type_4                        | 148/200 | 3.11E-20 | 6.97E-18         |
| Cystic_hydrroma                              | 148/200 | 3.11E-20 | 6.97E-18         |
| Acromesomelic_dysplasia_Hunter_Thompson_type | 147/200 | 1.22E-19 | 2.11E-17         |
| Acromesomelic_dysplasia                      | 147/200 | 1.22E-19 | 2.11E-17         |
| Exostoses_multiple_type_1                    | 147/200 | 1.22E-19 | 2.11E-17         |
| Scholte_syndrome                             | 146/200 | 4.69E-19 | 6.58E-17         |
| Congenital_diaphragmatic_hernia              | 146/200 | 4.69E-19 | 6.58E-17         |
| Hereditary_multiple_osteochondromas          | 146/200 | 4.69E-19 | 6.58E-17         |
| Aortopulmonary_window                        | 145/200 | 1.76E-18 | 1.88E-16         |
| Corpus_callosum_agenesis                     | 145/200 | 1.76E-18 | 1.88E-16         |
| Apert_syndrome                               | 145/200 | 1.76E-18 | 1.88E-16         |
| Subependymoma                                | 145/200 | 1.76E-18 | 1.88E-16         |

### Rare Diseases GenerIF ARCHS4 Predictions: 8,405 genes

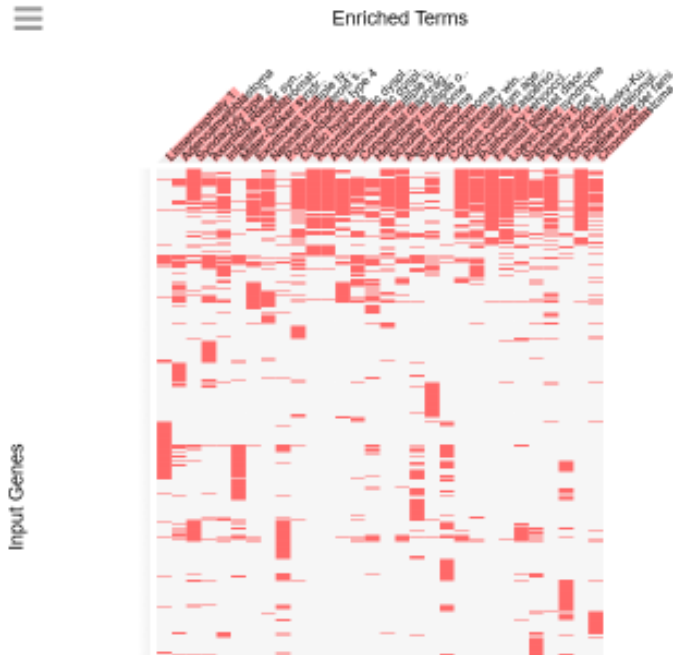



### Rare Diseases AutoRIF ARCHS4 Predictions: 8,405 genes

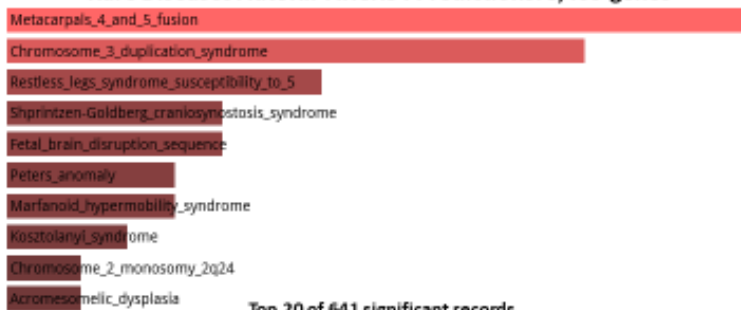

| Term                                          | Overlap | P-value  | Adjusted P-value |
|-----------------------------------------------|---------|----------|------------------|
| Metacarpals_4_and_5_fusion                    | 163/200 | 1.33E-30 | 4.97E-27         |
| Chromosome_3_duplication_syndrome             | 160/200 | 2.69E-28 | 5.01E-25         |
| Restless_legs_syndrome_susceptibility_to_5    | 155/200 | 1.01E-24 | 1.25E-21         |
| Shprintzen-Goldberg_craniosynostosis_syndrome | 153/200 | 2.21E-23 | 1.65E-20         |
| Fetal_brain_disruption_sequence               | 153/200 | 2.21E-23 | 1.65E-20         |
| Peters_anomaly                                | 152/200 | 9.95E-23 | 5.3E-20          |
| Marfanoid_hypermobility_syndrome              | 152/200 | 9.95E-23 | 5.3E-20          |
| Kostolanyi_syndrome                           | 151/200 | 4.35E-22 | 2.03E-19         |
| Chromosome_2_monosomy_2q24                    | 150/200 | 1.85E-21 | 6.28E-19         |
| Acromesomelic_dysplasia_Hunter_Thompson_type  | 150/200 | 1.85E-21 | 6.28E-19         |
| Acromesomelic_dysplasia                       | 150/200 | 1.85E-21 | 6.28E-19         |
| Chromosome_3_trisomy_3p                       | 140/200 | 7.69E-21 | 2.2E-18          |
| Buschko-Ollendorff_syndrome                   | 140/200 | 7.69E-21 | 2.2E-18          |
| Fraser_IIke_syndrome                          | 148/200 | 3.11E-20 | 6.81E-18         |
| Crandall_syndrome                             | 148/200 | 3.11E-20 | 6.81E-18         |
| Orofaciodigital_syndrome_11                   | 148/200 | 3.11E-20 | 6.81E-18         |
| Postaxial_polydactyly_mental_retardation      | 148/200 | 3.11E-20 | 6.81E-18         |
| Short_rib_polydactyly_syndrome_type_4         | 147/200 | 1.22E-19 | 2.28E-17         |
| Trichorhinophalangeal_syndrome_type_3         | 147/200 | 1.22E-19 | 2.28E-17         |
| Duane_syndrome                                | 147/200 | 1.22E-19 | 2.28E-17         |

### Rare Diseases AutoRIF ARCHS4 Predictions: 8,405 genes

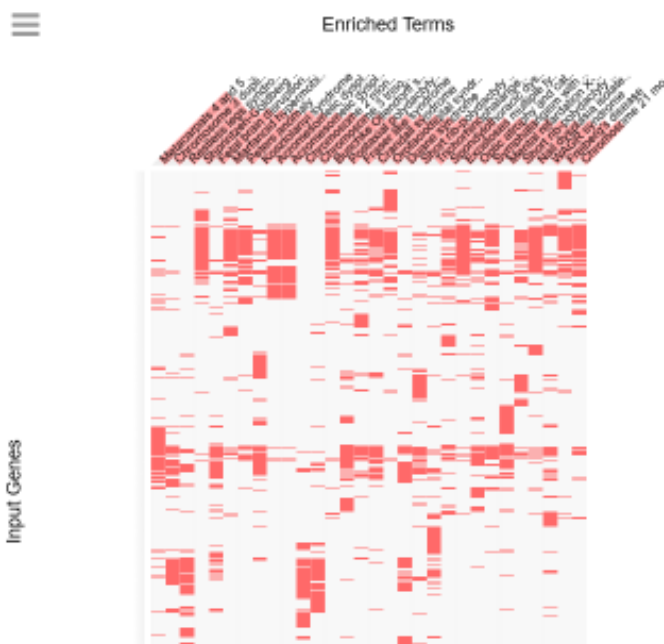

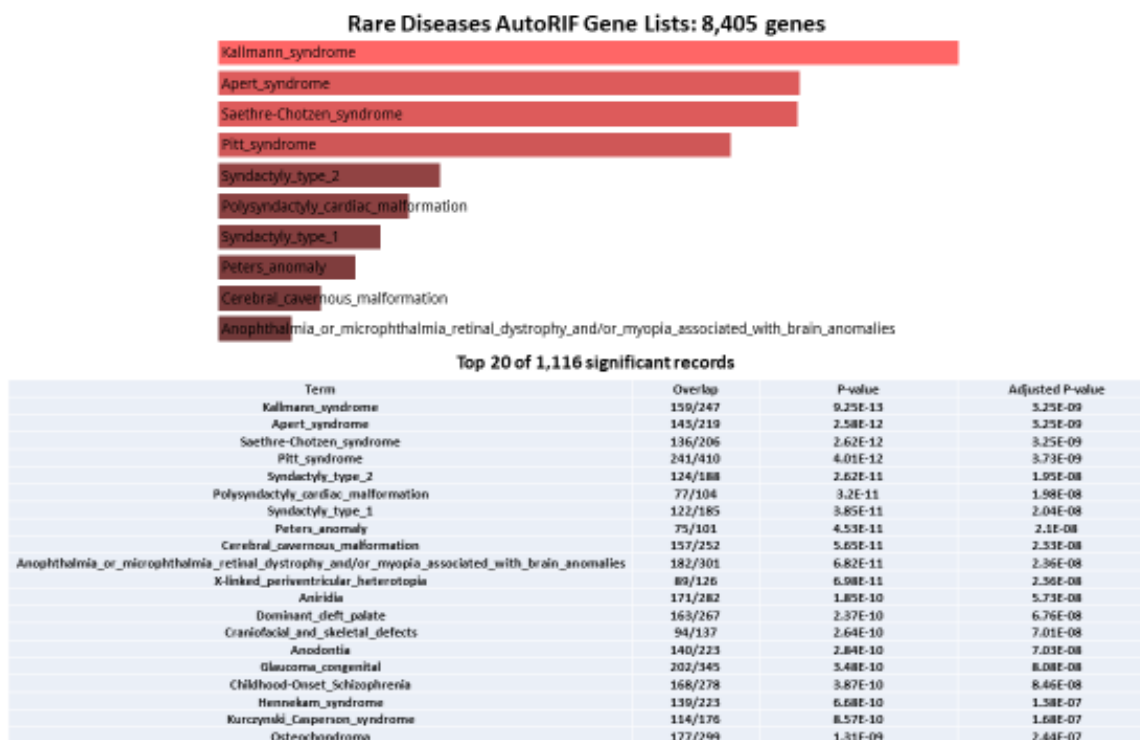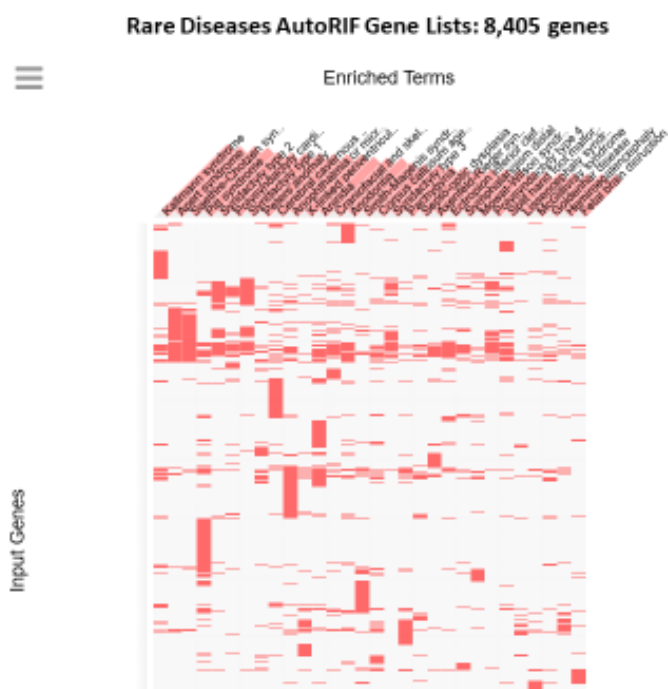

**Supplemental Figure S5.** Identification of genes implicated in more than 1,000 records classified as human rare diseases.

### GO Molecular Function: 8,045 genes

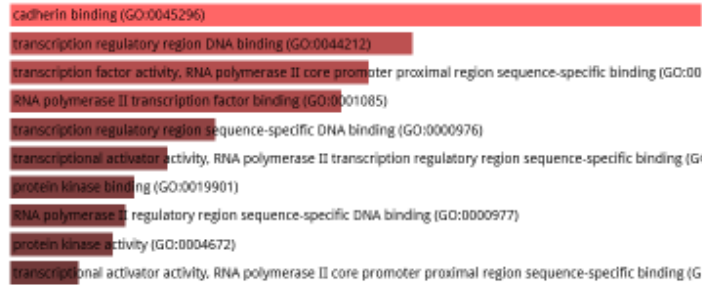

### GO Biological Process: 8,045 genes

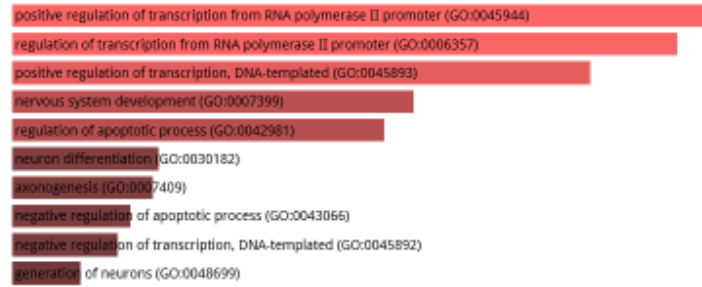

### GO Molecular Function: 8,045 genes

Enriched Terms

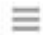

Input Genes

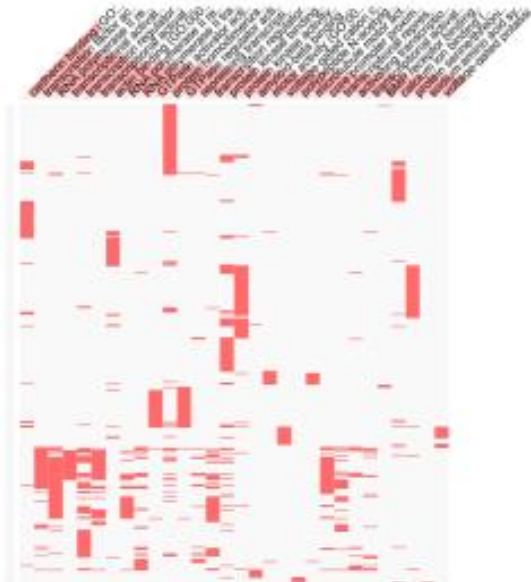

### GO Biological Process: 8,045 genes

Enriched Terms

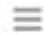

Input Genes

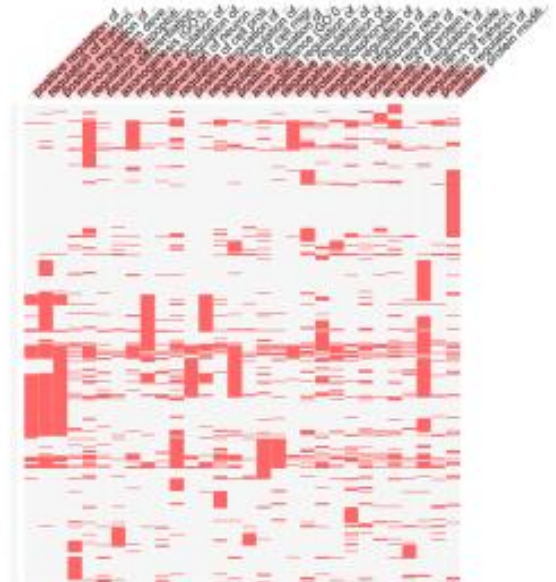

### GO Biological Process (8,045 genes): Top 35 of 308 significant records

| Term                                                                              | Overlap                 | P-value                  | Adjusted P-value         |
|-----------------------------------------------------------------------------------|-------------------------|--------------------------|--------------------------|
| positive regulation of transcription from RNA polymerase II promoter (GO:0045944) | 485/840                 | 1.12E-19                 | 5.67E-16                 |
| regulation of transcription from RNA polymerase II promoter (GO:0006357)          | 786/1470                | 2.51E-19                 | 6.37E-16                 |
| positive regulation of transcription, DNA-templated (GO:0045893)                  | 611/1121                | 3.46E-18                 | 5.85E-15                 |
| <a href="#">nervous system development (GO:0007399)</a>                           | <a href="#">276/456</a> | <a href="#">7.07E-10</a> | <a href="#">8.98E-13</a> |
| regulation of apoptotic process (GO:0042981)                                      | 453/816                 | 1.74E-15                 | 1.77E-12                 |
| <a href="#">neuron differentiation (GO:0030182)</a>                               | <a href="#">100/140</a> | <a href="#">1.57E-12</a> | <a href="#">1.33E-09</a> |
| <a href="#">axonogenesis (GO:0007409)</a>                                         | <a href="#">140/224</a> | <a href="#">1.88E-12</a> | <a href="#">1.37E-09</a> |
| negative regulation of apoptotic process (GO:0043066)                             | 279/486                 | 3.63E-12                 | 2.31E-09                 |
| negative regulation of transcription, DNA-templated (GO:0045892)                  | 437/814                 | 5.40E-12                 | 3.07E-09                 |
| <a href="#">generation of neurons (GO:0048695)</a>                                | <a href="#">93/131</a>  | <a href="#">1.60E-11</a> | <a href="#">7.05E-09</a> |
| regulation of cell proliferation (GO:0042127)                                     | 400/741                 | 1.67E-11                 | 7.69E-09                 |
| positive regulation of nucleic acid-templated transcription (GO:1003508)          | 284/503                 | 2.98E-11                 | 1.26E-08                 |
| negative regulation of transcription from RNA polymerase II promoter (GO:0000122) | 314/566                 | 4.51E-11                 | 1.76E-08                 |
| regulation of cell migration (GO:0030334)                                         | 190/317                 | 7.61E-11                 | 2.76E-08                 |
| positive regulation of gene expression (GO:0010628)                               | 410/772                 | 1.69E-10                 | 5.73E-08                 |
| <a href="#">axon guidance (GO:0007411)</a>                                        | <a href="#">106/150</a> | <a href="#">2.78E-10</a> | <a href="#">8.82E-08</a> |
| negative regulation of cellular process (GO:0048523)                              | 295/535                 | 4.21E-10                 | 1.20E-07                 |
| negative regulation of cell proliferation (GO:0008285)                            | 210/364                 | 9.35E-10                 | 2.64E-07                 |
| negative regulation of programmed cell death (GO:0043069)                         | 232/409                 | 1.08E-09                 | 2.88E-07                 |
| protein phosphorylation (GO:0006468)                                              | 261/471                 | 2.26E-09                 | 5.62E-07                 |
| negative regulation of gene expression (GO:0010629)                               | 332/619                 | 2.32E-09                 | 5.62E-07                 |
| positive regulation of macromolecule metabolic process (GO:0010600)               | 105/277                 | 2.5E-09                  | 5.78E-07                 |
| transmembrane receptor protein tyrosine kinase signaling pathway (GO:0007169)     | 224/397                 | 3.91E-09                 | 8.63E-07                 |
| positive regulation of cell differentiation (GO:0045597)                          | 122/195                 | 5.25E-09                 | 1.11E-06                 |
| activation of protein kinase activity (GO:0032147)                                | 142/234                 | 5.85E-09                 | 1.19E-06                 |
| positive regulation of protein phosphorylation (GO:0001934)                       | 231/413                 | 6.36E-09                 | 1.24E-06                 |
| <a href="#">central nervous system development (GO:0007417)</a>                   | <a href="#">133/218</a> | <a href="#">1.1E-08</a>  | <a href="#">2.06E-06</a> |
| negative regulation of cellular macromolecule biosynthetic process (GO:2000113)   | 278/513                 | 1.29E-08                 | 2.34E-06                 |
| regulation of transcription, DNA-templated (GO:0006355)                           | 776/1599                | 2.65E-08                 | 4.64E-06                 |
| positive regulation of epithelial cell migration (GO:0010634)                     | 55/75                   | 3.67E-08                 | 6.13E-06                 |
| cellular protein modification process (GO:0006464)                                | 504/1002                | 3.74E-08                 | 6.13E-06                 |
| positive regulation of cell migration (GO:0030335)                                | 133/222                 | 5.27E-08                 | 8.35E-06                 |
| positive regulation of cell proliferation (GO:0008284)                            | 233/425                 | 5.42E-08                 | 8.35E-06                 |
| <a href="#">neuron projection morphogenesis (GO:0048812)</a>                      | <a href="#">103/164</a> | <a href="#">5.98E-08</a> | <a href="#">8.94E-06</a> |
| positive regulation of multicellular organismal process (GO:0051290)              | 123/203                 | 6.72E-08                 | 9.60E-06                 |

### GO Molecular Function (8,045 genes): Top 30 of 81 significant records

| Term                                                                                                                         | Overlap | P-value  | Adjusted P-value |
|------------------------------------------------------------------------------------------------------------------------------|---------|----------|------------------|
| cadherin binding (GO:0045296)                                                                                                | 191/314 | 1.1E-11  | 1.26E-08         |
| transcription regulatory region DNA binding (GO:0044212)                                                                     | 216/375 | 6.56E-10 | 3.76E-07         |
| transcription factor activity, RNA polymerase II core promoter proximal region sequence-specific binding (GO:0000982)        | 168/281 | 1.22E-09 | 4.66E-07         |
| RNA polymerase II transcription factor binding (GO:0001085)                                                                  | 84/122  | 1.79E-09 | 5.11E-07         |
| transcription regulatory region sequence-specific DNA binding (GO:0000976)                                                   | 171/293 | 1.06E-08 | 2.43E-06         |
| transcriptional activator activity, RNA polymerase II transcription regulatory region sequence-specific binding (GO:0001228) | 166/285 | 2.1E-08  | 4.01E-06         |
| protein kinase binding (GO:0019901)                                                                                          | 268/496 | 3.35E-08 | 5.4E-06          |
| RNA polymerase II regulatory region sequence-specific DNA binding (GO:0000977)                                               | 251/461 | 3.78E-08 | 5.4E-06          |
| protein kinase activity (GO:0004672)                                                                                         | 276/514 | 4.5E-08  | 5.72E-06         |
| transcriptional activator activity, RNA polymerase II core promoter proximal region sequence-specific binding (GO:0001077)   | 109/176 | 7.35E-08 | 8.4E-06          |
| GTPase regulator activity (GO:0030695)                                                                                       | 154/276 | 2.44E-06 | 0.000254         |
| amyloid-beta binding (GO:0001540)                                                                                            | 37/50   | 4.47E-06 | 0.000426         |
| protein serine/threonine kinase activity (GO:0004674)                                                                        | 197/369 | 5.99E-06 | 0.000518         |
| repressing transcription factor binding (GO:0070491)                                                                         | 39/54   | 6.67E-06 | 0.000518         |
| RNA polymerase II regulatory region DNA binding (GO:0001012)                                                                 | 116/202 | 6.8E-06  | 0.000518         |
| GTPase activator activity (GO:0005096)                                                                                       | 139/250 | 9.43E-06 | 0.000675         |
| voltage-gated cation channel activity (GO:0022843)                                                                           | 64/101  | 1.2E-05  | 0.000807         |
| motor activity (GO:0003774)                                                                                                  | 56/86   | 1.28E-05 | 0.000811         |
| regulatory region DNA binding (GO:0000975)                                                                                   | 126/225 | 1.52E-05 | 0.000916         |
| core promoter proximal region sequence-specific DNA binding (GO:0000987)                                                     | 152/279 | 1.65E-05 | 0.000943         |
| protein homodimerization activity (GO:0042803)                                                                               | 332/665 | 1.79E-05 | 0.000973         |
| actin binding (GO:0003779)                                                                                                   | 140/255 | 2.09E-05 | 0.001086         |
| PDZ domain binding (GO:0030165)                                                                                              | 43/63   | 2.29E-05 | 0.001141         |
| RNA polymerase II core promoter proximal region sequence-specific DNA binding (GO:0000978)                                   | 143/263 | 3.29E-05 | 0.001569         |
| transcriptional repressor activity, RNA polymerase II transcription regulatory region sequence-specific binding (GO:0001227) | 92/160  | 5.43E-05 | 0.002452         |
| protein tyrosine kinase activity (GO:0004713)                                                                                | 86/148  | 5.57E-05 | 0.002452         |
| microtubule motor activity (GO:0003777)                                                                                      | 41/61   | 6.16E-05 | 0.002608         |
| tubulin binding (GO:0015631)                                                                                                 | 138/256 | 7.7E-05  | 0.003145         |
| microtubule binding (GO:0008017)                                                                                             | 109/196 | 8.13E-05 | 0.003208         |
| acetylglucosaminyltransferase activity (GO:0008376)                                                                          | 34/49   | 9.81E-05 | 0.003742         |

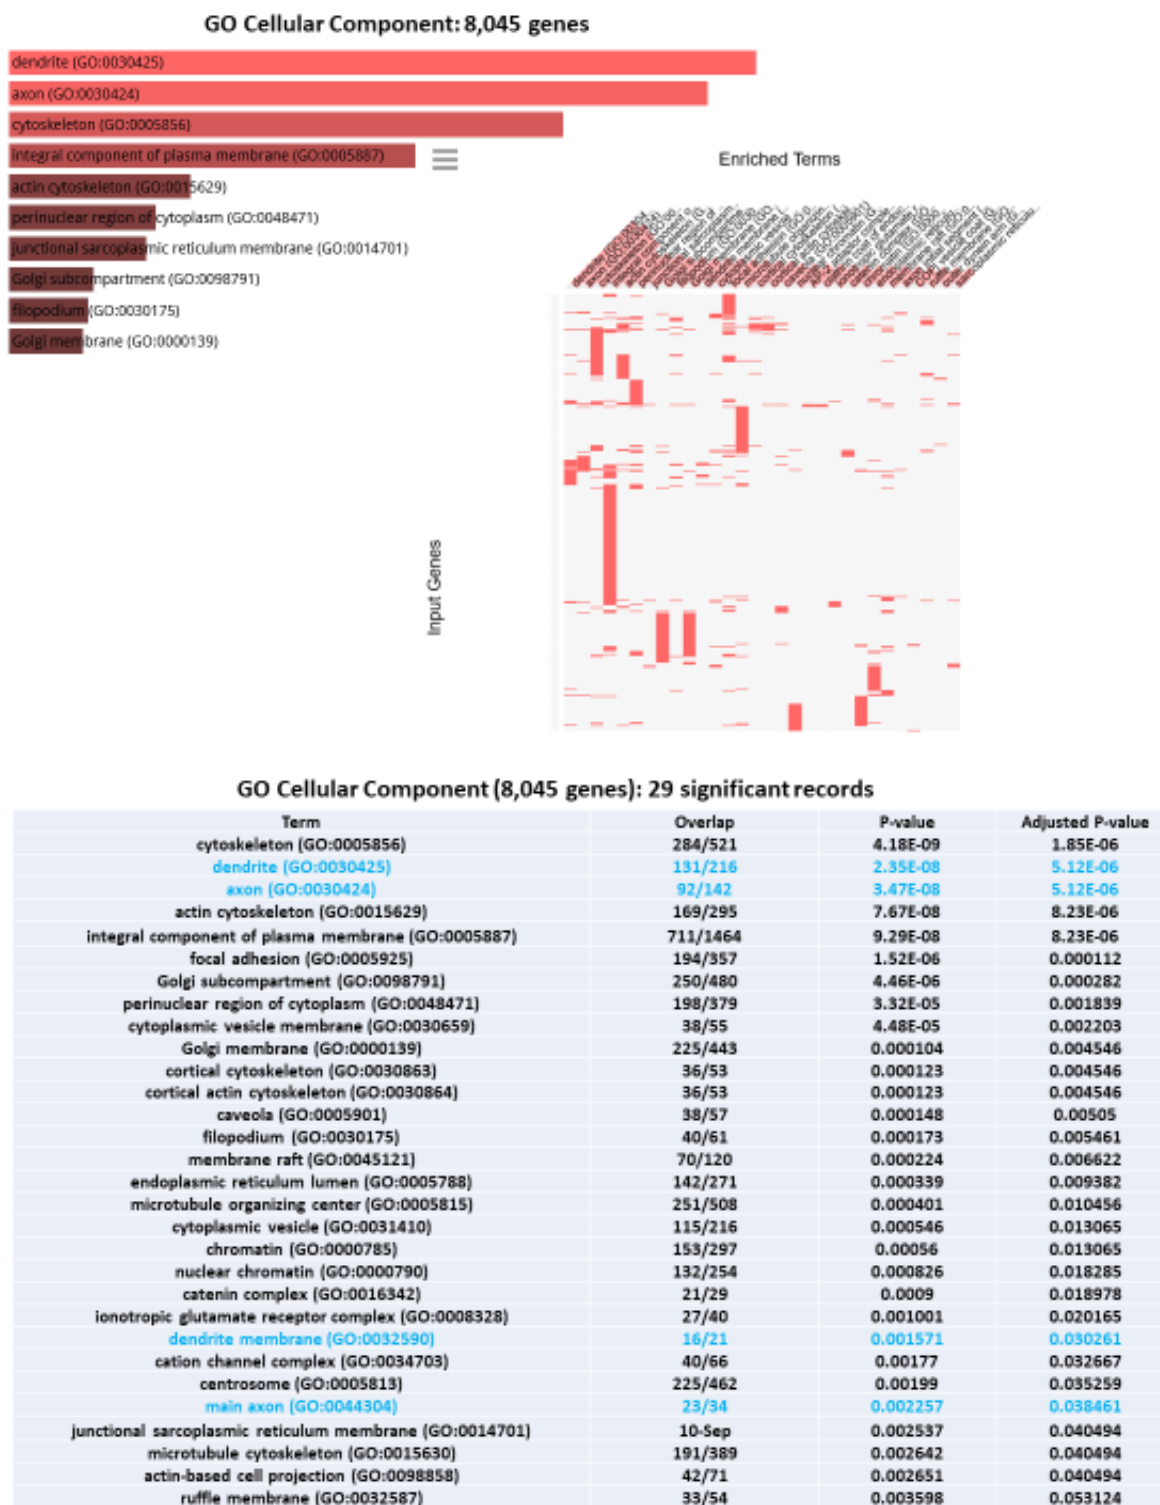

**Supplemental Figure S6.** Gene ontology analyses of putative regulatory targets of genetic loci harboring human-specific SNCs.

### KEGG 2019 Human: 8,405 genes

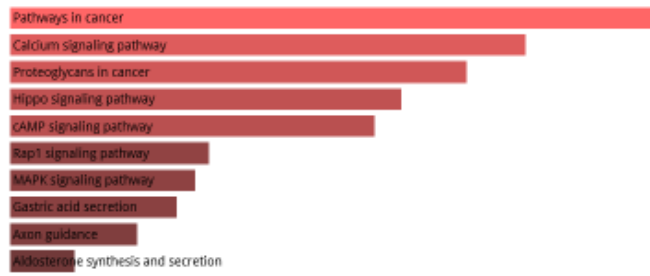

### KEGG 2019 Mouse: 8,405 genes

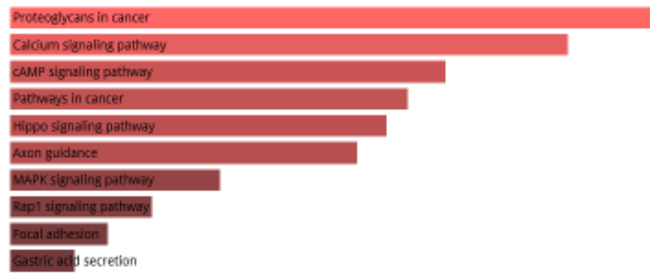

### KEGG 2019 Human: 8,405 genes

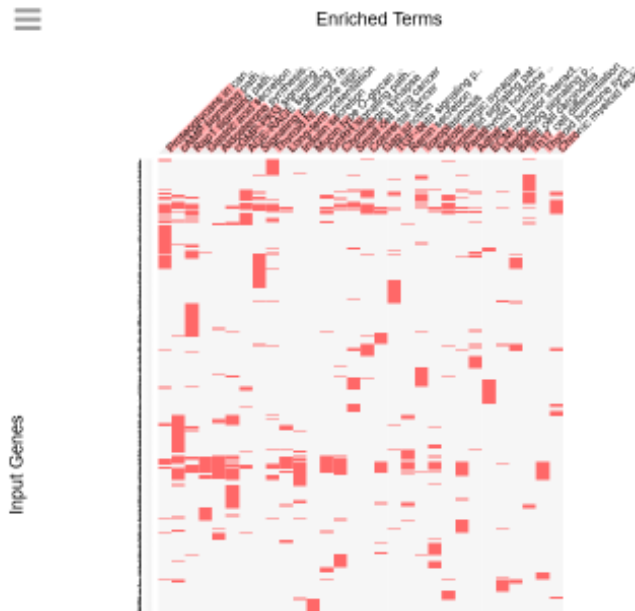

### KEGG 2019 Human (8,405 genes): Top 40 of 129 significant records

| Term                                                     | Overlap | P-value  | Adjusted P-value |
|----------------------------------------------------------|---------|----------|------------------|
| Pathways in cancer                                       | 512/530 | 2.04E-15 | 6.28E-13         |
| Calcium signaling pathway                                | 130/188 | 4.19E-14 | 6.45E-12         |
| Proteoglycans in cancer                                  | 136/201 | 1.55E-13 | 1.59E-11         |
| Hippo signaling pathway                                  | 112/160 | 6.61E-13 | 5.09E-11         |
| cAMP signaling pathway                                   | 140/212 | 1.21E-12 | 7.48E-11         |
| Rap1 signaling pathway                                   | 135/206 | 4.85E-11 | 2.40E-09         |
| MAPK signaling pathway                                   | 179/295 | 6.48E-11 | 2.85E-09         |
| Gastric acid secretion                                   | 59/75   | 9.75E-11 | 3.75E-09         |
| Axon guidance                                            | 118/181 | 2.39E-10 | 8.17E-09         |
| Aldosterone synthesis and secretion                      | 71/98   | 9.54E-10 | 2.94E-08         |
| cAMP-PKG signaling pathway                               | 108/166 | 1.62E-09 | 4.54E-08         |
| Focal adhesion                                           | 125/199 | 2.39E-09 | 6.14E-08         |
| AGE-RAGE signaling pathway in diabetic complications     | 70/100  | 1.35E-08 | 3.13E-07         |
| Dopaminergic synapse                                     | 87/131  | 1.42E-08 | 3.13E-07         |
| Signaling pathways regulating pluripotency of stem cells | 91/139  | 1.94E-08 | 3.98E-07         |
| Wnt signaling pathway                                    | 101/158 | 2.15E-08 | 4.13E-07         |
| Adrenergic signaling in cardiomyocytes                   | 94/145  | 2.36E-08 | 4.28E-07         |
| Gastric cancer                                           | 96/149  | 2.67E-08 | 4.56E-07         |
| Amoebiasis                                               | 67/96   | 1.35E-08 | 5.32E-07         |
| Thyroid hormone signaling pathway                        | 78/116  | 1.45E-08 | 5.32E-07         |
| PI3K-Akt signaling pathway                               | 199/354 | 4.17E-08 | 6.11E-07         |
| Long-term potentiation                                   | 50/67   | 5.95E-08 | 8.32E-07         |
| Melanogenesis                                            | 69/101  | 8.04E-08 | 1.08E-06         |
| Breast cancer                                            | 93/147  | 1.57E-07 | 2.02E-06         |
| Insulin secretion                                        | 60/86   | 1.75E-07 | 2.16E-06         |
| Cushing syndrome                                         | 97/155  | 1.84E-07 | 2.18E-06         |
| Crohnian enteritis                                       | 66/97   | 1.94E-07 | 2.22E-06         |
| Glutamatergic synapse                                    | 75/114  | 2.48E-07 | 2.73E-06         |
| Mucin type O-glycan biosynthesis                         | 27/31   | 2.65E-07 | 2.81E-06         |
| Relaxin signaling pathway                                | 83/130  | 4.06E-07 | 4.17E-06         |
| Gut01 signaling pathway                                  | 65/93   | 4.88E-07 | 4.65E-06         |
| Cholinergic synapse                                      | 73/112  | 6.18E-07 | 5.39E-06         |
| Oxytocin signaling pathway                               | 94/153  | 9.5E-07  | 8.87E-06         |
| Inflammatory mediator regulation of TRP channels         | 66/100  | 1.08E-06 | 9.78E-06         |
| Small cell lung cancer                                   | 62/93   | 1.35E-06 | 1.15E-05         |
| Human papillomavirus infection                           | 181/330 | 1.53E-06 | 1.31E-05         |
| Neuroactive ligand-receptor interaction                  | 184/338 | 2.41E-06 | 2.01E-05         |
| Colorectal cancer                                        | 57/86   | 4.72E-06 | 3.82E-05         |
| Gap junction                                             | 58/88   | 5.1E-06  | 4.03E-05         |
| TGF-beta signaling pathway                               | 59/90   | 5.49E-06 | 4.22E-05         |

### KEGG 2019 Mouse: 8,405 genes

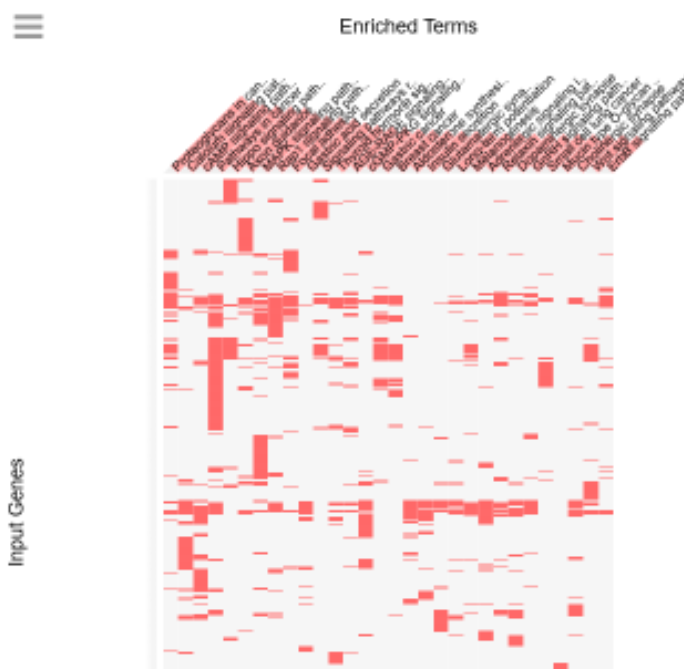

KEGG 2019 Mouse (8,405 genes): Top 35 of 106 significant records

| Term                                                     | Overlap | P-value  | Adjusted P-value |
|----------------------------------------------------------|---------|----------|------------------|
| Proteoglycans in cancer                                  | 136/203 | 4.94E-13 | 1.5E-10          |
| Calcium signaling pathway                                | 127/189 | 2.09E-12 | 3.16E-10         |
| cAMP signaling pathway                                   | 137/211 | 1.36E-11 | 1.38E-09         |
| Pathways in cancer                                       | 300/535 | 2.41E-11 | 1.83E-09         |
| Hippo signaling pathway                                  | 108/159 | 3.32E-11 | 2.01E-09         |
| Axon guidance                                            | 119/180 | 5.22E-11 | 2.64E-09         |
| MAPK signaling pathway                                   | 176/294 | 4.31E-10 | 1.86E-08         |
| Rap1 signaling pathway                                   | 131/209 | 1.22E-09 | 4.62E-08         |
| Focal adhesion                                           | 125/199 | 2.39E-09 | 8.05E-08         |
| Gastric acid secretion                                   | 56/74   | 3.97E-09 | 1.2E-07          |
| Signaling pathways regulating pluripotency of stem cells | 90/137  | 1.8E-08  | 4.96E-07         |
| Thyroid hormone signaling pathway                        | 77/115  | 5.58E-08 | 1.41E-06         |
| AGE-RAGE signaling pathway in diabetic complications     | 69/101  | 8.04E-08 | 1.88E-06         |
| cGMP-PKG signaling pathway                               | 106/172 | 1.58E-07 | 3.43E-06         |
| Gastric cancer                                           | 94/150  | 2.59E-07 | 5.22E-06         |
| Breast cancer                                            | 92/147  | 3.76E-07 | 7.12E-06         |
| Aldosterone synthesis and secretion                      | 68/102  | 4.22E-07 | 7.52E-06         |
| Insulin secretion                                        | 59/86   | 5.53E-07 | 9.32E-06         |
| Glutamatergic synapse                                    | 74/114  | 6.6E-07  | 1.05E-05         |
| Long-term potentiation                                   | 48/67   | 8.6E-07  | 1.3E-05          |
| Melanogenesis                                            | 66/100  | 1.08E-06 | 1.56E-05         |
| Adrenergic signaling in cardiomyocytes                   | 91/148  | 1.34E-06 | 1.84E-05         |
| PI3K-Akt signaling pathway                               | 194/357 | 1.52E-06 | 1.98E-05         |
| Relaxin signaling pathway                                | 82/131  | 1.57E-06 | 1.98E-05         |
| Dopaminergic synapse                                     | 84/135  | 1.68E-06 | 2.04E-05         |
| GnRH signaling pathway                                   | 60/90   | 1.99E-06 | 2.32E-05         |
| Small cell lung cancer                                   | 61/92   | 2.17E-06 | 2.43E-05         |
| Mucin type O-glycan biosynthesis                         | 24/28   | 2.36E-06 | 2.56E-05         |
| Cholinergic synapse                                      | 72/113  | 2.6E-06  | 2.72E-05         |
| Wnt signaling pathway                                    | 90/160  | 3.27E-06 | 3.3E-05          |
| ErbB signaling pathway                                   | 56/84   | 4.34E-06 | 4.24E-05         |
| Circadian entrainment                                    | 64/99   | 4.53E-06 | 4.29E-05         |
| Oxytocin signaling pathway                               | 92/154  | 6.68E-06 | 6.13E-05         |
| Cushing syndrome                                         | 94/159  | 9.8E-06  | 8.74E-05         |
| Gap junction                                             | 56/86   | 1.28E-05 | 0.000111         |

**Supplemental Figure S7.** KEGG analyses of putative regulatory targets of genetic loci harboring human-specific SNCS.



**Association with networks of human-specific regulatory sequences (HSGRS) and stem cell-associated retroviral sequences (SCARS) of 8,405 genes associated with 35,074 fixed human-specific single nucleotide changes located in differentially-accessible chromatin regions during human neurogenesis in cerebral organoids**

| Classification category                                           | Number of genes | Percent |
|-------------------------------------------------------------------|-----------------|---------|
| Unique genes                                                      | 8405            | 100.00  |
| In network of human-specific genomic regulatory sequences (HSGRS) | 7406            | 88.11   |
| LTR5_Hs/SVA_D enhancers-regulated genes                           | 1387            | 16.50   |
| HERVH lincRNA-regulated genes                                     | 3191            | 37.97   |
| LTR7Y/B enhancers-regulated genes                                 | 3306            | 39.33   |
| In network of stem cell-associated retroviral sequences (SCARS)   | 4029            | 47.94   |
| Both HSGRS & SCARS-regulated genes                                | 3602            | 42.86   |
| All HSGRS & SCARS-regulated genes                                 | 7833            | 93.19   |

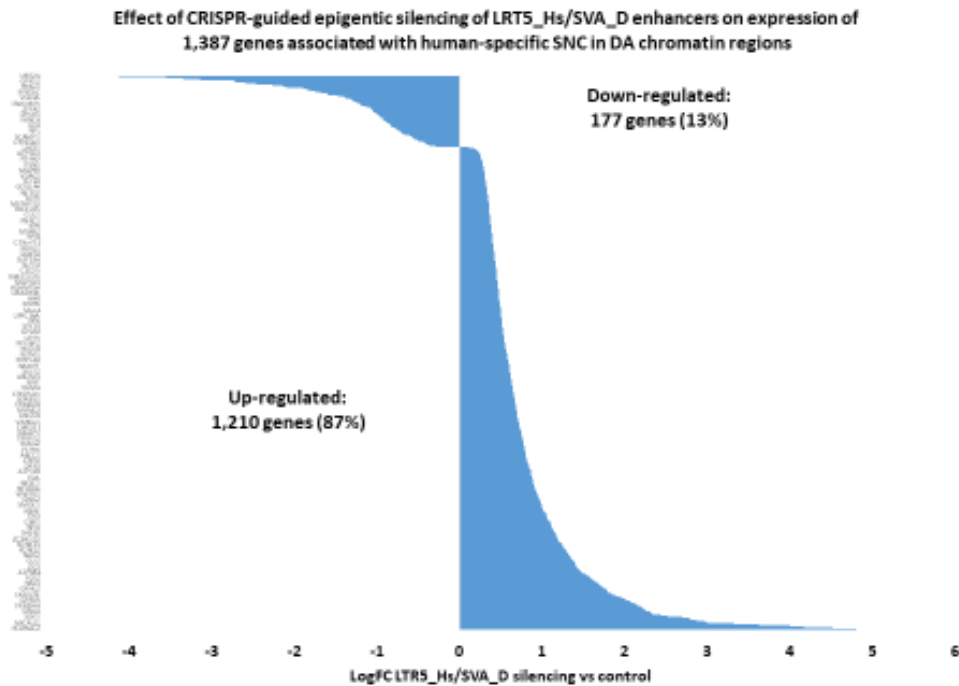

**Effects of stem cell-associated regulatory sequences (SCARS) on expression of 4,029 genes associated with human-specific SNCs located in DA chromatin regions**

| Classification category                 | Number of genes | Down-regulated | Percent | Up-regulated | Percent |
|-----------------------------------------|-----------------|----------------|---------|--------------|---------|
| LTR5_Hs/SVA_D enhancers-regulated genes | 1387            | 1210           | 87.24   | 177          | 12.76   |
| HERVH lncRNA-regulated genes            | 3191            | 1733           | 54.31   | 1458         | 45.69   |
| LTR7Y/B enhancers-regulated genes       | 3306            | 2494           | 75.44   | 812          | 24.56   |

**Supplemental Figure S8.** Structurally, functionally, and evolutionary distinct classes of HSRS share the relatively restricted elite set of common genetic targets.

### MGI Mammalian Phenotype 2017: 8,405 genes

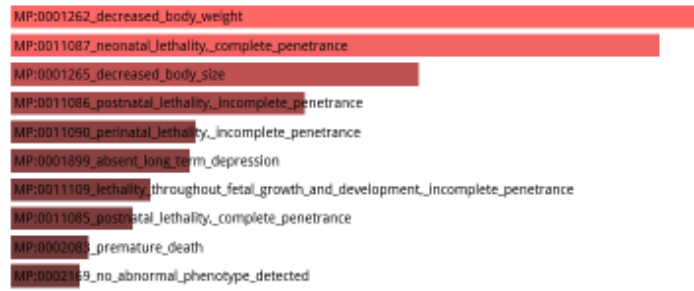

### MGI Mammalian Phenotype 2017: 8,405 genes

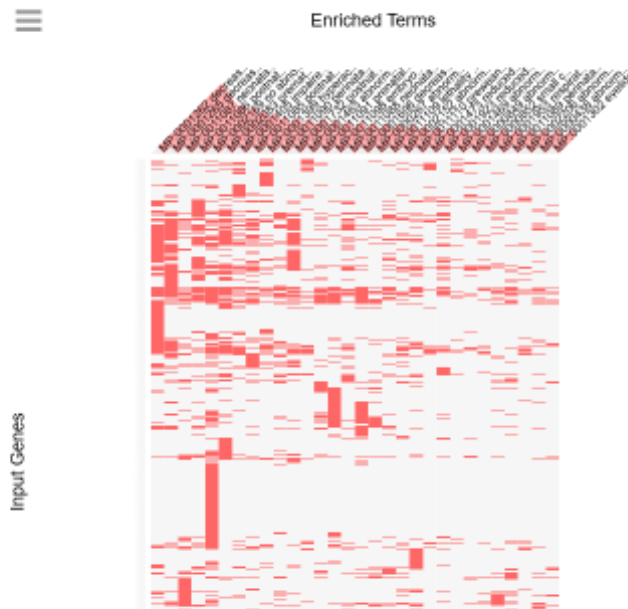

### MGI Mammalian Phenotype 2017 (8,405 genes): Top 40 of 749 significant records

| Term                                                                              | Overlap  | P-value  | Adjusted P-value |
|-----------------------------------------------------------------------------------|----------|----------|------------------|
| MP:0001262_decreased_body_weight                                                  | 692/1189 | 4.71E-51 | 2.44E-27         |
| MP:0001263_decreased_body_size                                                    | 472/774  | 2.25E-27 | 5.82E-24         |
| MP:0011087_neonatal_letality_complete_penetrance                                  | 299/462  | 2.47E-23 | 4.25E-20         |
| MP:0011086_postnatal_letality_incomplete_penetrance                               | 346/563  | 4.06E-21 | 5.26E-18         |
| MP:0002169_no_abnormal_phenotype_detected                                         | 882/1674 | 2.98E-20 | 3.08E-17         |
| MP:0002085_premature_death                                                        | 474/834  | 1.12E-18 | 9.65E-16         |
| MP:0001405_impaired_coordination                                                  | 215/332  | 5.43E-17 | 2.54E-14         |
| MP:0011085_postnatal_letality_complete_penetrance                                 | 238/384  | 1.57E-15 | 1.02E-12         |
| MP:0001399_hyperactivity                                                          | 216/344  | 4.36E-15 | 2.51E-12         |
| MP:0011090_perinatal_letality_incomplete_penetrance                               | 152/226  | 1.28E-14 | 6.65E-12         |
| MP:0001732_postnatal_growth_retardation                                           | 359/590  | 1.43E-14 | 6.75E-12         |
| MP:0001463_abnormal_spatial_learning                                              | 115/162  | 6.87E-14 | 2.98E-11         |
| MP:0011091_prenatal_letality_complete_penetrance                                  | 174/272  | 1.81E-13 | 7.22E-11         |
| MP:0011098_embryonic_letality_during_organogenesis_complete_penetrance            | 319/559  | 2.9E-13  | 1.07E-10         |
| MP:0011088_neonatal_letality_incomplete_penetrance                                | 163/255  | 1.15E-12 | 3.97E-10         |
| MP:0001698_decreased_embryo_size                                                  | 273/472  | 1.96E-12 | 6.36E-10         |
| MP:0000267_abnormal_heart_development                                             | 109/157  | 3.11E-12 | 9.48E-10         |
| MP:0011109_letality_throughout_fetal_growth_and_development_incomplete_penetrance | 116/170  | 5.92E-12 | 1.13E-09         |
| MP:0002152_abnormal_brain_morphology                                              | 104/152  | 3.9E-11  | 1.06E-08         |
| MP:0011110_prewearing_letality_incomplete_penetrance                              | 222/381  | 8.85E-11 | 2.29E-08         |
| MP:0001473_reduced_long_term_potential                                            | 77/106   | 1.52E-10 | 3.75E-08         |
| MP:0001923_reduced_female_fertility                                               | 142/227  | 5.06E-10 | 7.2E-08          |
| MP:0004811_abnormal_neuron_physiology                                             | 67/90    | 4.06E-10 | 8.85E-08         |
| MP:0000788_abnormal_cerebral_cortex_morphology                                    | 98/145   | 4.1E-10  | 8.85E-08         |
| MP:0001406_abnormal_gait                                                          | 180/302  | 4.48E-10 | 9.28E-08         |
| MP:0001469_abnormal_contextual_conditioning_behavior                              | 45/54    | 4.96E-10 | 9.82E-08         |
| MP:0000849_abnormal_cerebellum_morphology                                         | 68/92    | 5.12E-10 | 9.82E-08         |
| MP:0000266_abnormal_heart_morphology                                              | 139/224  | 1.03E-09 | 1.91E-07         |
| MP:0000852_small_cerebellum                                                       | 52/66    | 1.15E-09 | 2.05E-07         |
| MP:0001953_respiratory_failure                                                    | 98/147   | 1.29E-09 | 2.23E-07         |
| MP:0011089_perinatal_letality_complete_penetrance                                 | 135/217  | 1.41E-09 | 2.35E-07         |
| MP:0002206_abnormal_CNS_synaptic_transmission                                     | 66/90    | 1.8E-09  | 2.59E-07         |
| MP:0000438_abnormal_cranium_morphology                                            | 90/133   | 1.91E-09 | 2.99E-07         |
| MP:0001302_eyelids_open_at_birth                                                  | 43/52    | 1.97E-09 | 3E-07            |
| MP:0000807_abnormal_hippocampus_morphology                                        | 63/86    | 4.04E-09 | 5.97E-07         |
| MP:0006009_abnormal_neuronal_migration                                            | 57/76    | 5.14E-09 | 7.28E-07         |
| MP:0001954_respiratory_distress                                                   | 111/174  | 5.2E-09  | 7.28E-07         |
| MP:0001890_absent_long_term_depression                                            | 25/28    | 5.88E-09 | 7.95E-07         |
| MP:0002906_increased_susceptibility_to_pharmacologically_induced_seizures         | 65/90    | 5.99E-09 | 7.95E-07         |
| MP:0005633_abnormal_nervous_system_physiology                                     | 74/106   | 6.53E-09 | 8.12E-07         |

### MGI Mammalian Phenotype Level 4 2019: 8.405 genes

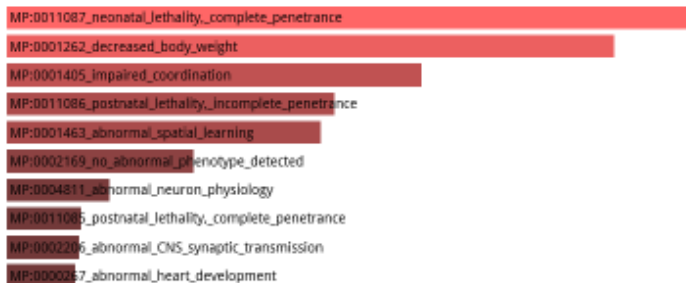

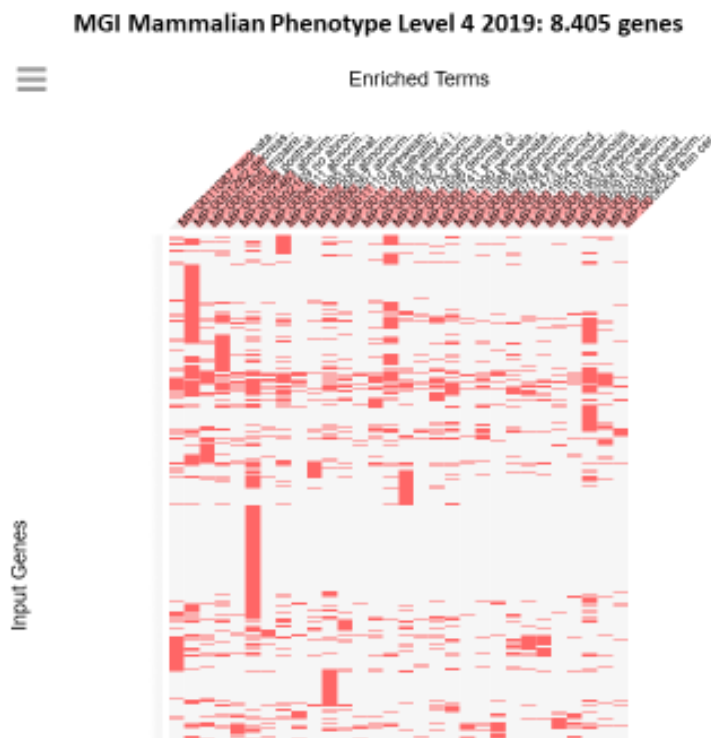

**MGI Mammalian Phenotype Level 4 2019 (8,405 genes): top 40 of 407 significant records**

| Term                                                                               | Overlap  | P-value  | Adjusted P-value |
|------------------------------------------------------------------------------------|----------|----------|------------------|
| MP:0011087_neonatal_lethality_complete_penetrance                                  | 315/517  | 1.55E-18 | 8.15E-15         |
| MP:0001262_decreased_body_weight                                                   | 773/1471 | 2.04E-17 | 5.36E-14         |
| MP:0001405_impaired_coordination                                                   | 247/405  | 6.90E-15 | 1.21E-11         |
| MP:0011086_postnatal_lethality_incomplete_penetrance                               | 362/645  | 9.65E-14 | 1.27E-10         |
| MP:0001465_abnormal_spatial_learning                                               | 120/172  | 1.46E-13 | 1.54E-10         |
| MP:0002169_no_abnormal_phenotype_detected                                          | 958/1944 | 6.87E-12 | 6.02E-09         |
| MP:0004811_abnormal_neuron_physiology                                              | 78/107   | 8.69E-11 | 6.53E-08         |
| MP:0002206_abnormal_CNS_synaptic_transmission                                      | 75/103   | 2.18E-10 | 1.27E-07         |
| MP:0000267_abnormal_heart_development                                              | 111/168  | 2.43E-10 | 1.28E-07         |
| MP:0011085_postnatal_lethality_complete_penetrance                                 | 246/432  | 2.04E-10 | 1.34E-07         |
| MP:0011110_prenatal_lethality_incomplete_penetrance                                | 360/669  | 2.90E-10 | 1.39E-07         |
| MP:0011109_lethality_throughout_fetal_growth_and_development_incomplete_penetrance | 122/191  | 8.21E-10 | 3.60E-07         |
| MP:0001899_absent_long_term_depression                                             | 27/28    | 1.11E-09 | 4.50E-07         |
| MP:0001732_postnatal_growth_retardation                                            | 360/677  | 1.85E-09 | 6.48E-07         |
| MP:0001698_decreased_embryo_size                                                   | 293/537  | 2.09E-09 | 6.88E-07         |
| MP:0002152_abnormal_brain_morphology                                               | 119/187  | 1.84E-09 | 6.92E-07         |
| MP:0011090_perinatal_lethality_incomplete_penetrance                               | 154/256  | 3.23E-09 | 9.44E-07         |
| MP:0002741_small_olfactory_bulb                                                    | 35/40    | 3.07E-09 | 9.51E-07         |
| MP:0001469_abnormal_contextual_conditioning_behavior                               | 48/61    | 5.45E-09 | 1.45E-06         |
| MP:0001473_reduced_long_term_potential                                             | 84/124   | 6.05E-09 | 1.45E-06         |
| MP:0000788_abnormal_cerebral_cortex_morphology                                     | 104/161  | 5.79E-09 | 1.45E-06         |
| MP:0011088_neonatal_lethality_incomplete_penetrance                                | 172/293  | 5.33E-09 | 1.48E-06         |
| MP:0001954_respiratory_distress                                                    | 121/194  | 7.90E-09 | 1.81E-06         |
| MP:0001575_cyanosis                                                                | 129/210  | 1.00E-08 | 2.19E-06         |
| MP:0001955_respiratory_failure                                                     | 103/161  | 1.47E-08 | 3.09E-06         |
| MP:0002906_increased_susceptibility_to_pharmacologically_induced_seizures          | 70/101   | 2.60E-08 | 5.25E-06         |
| MP:0002910_abnormal_excitatory_postsynaptic_currents                               | 59/83    | 7.68E-08 | 1.50E-05         |
| MP:0002083_premature_death                                                         | 499/997  | 9.80E-08 | 1.84E-05         |
| MP:0002066_abnormal_motor_capabilities/coordination/movement                       | 102/164  | 1.41E-07 | 2.55E-05         |
| MP:0006254_thin_cerebral_cortex                                                    | 53/74    | 2.36E-07 | 4.14E-05         |
| MP:0011098_embryonic_lethality_during_organogenesis_complete_penetrance            | 339/656  | 2.60E-07 | 4.28E-05         |
| MP:0000807_abnormal_hippocampus_morphology                                         | 63/92    | 2.56E-07 | 4.34E-05         |
| MP:0006009_abnormal_neuronal_migration                                             | 59/85    | 2.94E-07 | 4.69E-05         |
| MP:0011108_embryonic_lethality_during_organogenesis_incomplete_penetrance          | 143/247  | 3.20E-07 | 4.95E-05         |
| MP:0000031_abnormal_cochlea_morphology                                             | 44/59    | 3.84E-07 | 5.77E-05         |
| MP:0000852_small_cerebellum                                                        | 58/84    | 4.91E-07 | 7.17E-05         |
| MP:0002063_abnormal_learning/memory/conditioning                                   | 42/56    | 5.43E-07 | 7.52E-05         |
| MP:0003633_abnormal_nervous_system_physiology                                      | 79/123   | 5.36E-07 | 7.62E-05         |
| MP:0010025_decreased_total_body_fat_amount                                         | 263/498  | 5.94E-07 | 8.01E-05         |
| MP:0009937_abnormal_neuron_differentiation                                         | 75/116   | 7.01E-07 | 9.22E-05         |

**Supplemental Figure S9.** Interrogation of MGI Mammalian Phenotype databases identifies genes associated with human-specific SNCs and implicated in premature death and embryonic, perinatal, neonatal, and postnatal lethality phenotypes.
